# Supplementary material for: Strong metal–borane interactions in low-valent cyclopentadienyl rhodium complexes
Source: Royal Society of Chemistry journal article supplement (doi:10.1039/c9cc06639j), 2019-01-01
Supplement: c9cc06639j1.pdf [file c9cc06639j1.pdf]

## Supplementary Information

Maxime Boudjelel,<sup>a</sup> Sonia Mallet–Ladeira,<sup>b</sup> Ghenwa Bouhadir<sup>a</sup> and Didier Bourissou<sup>a\*</sup>

<sup>a</sup> CNRS / Université Paul Sabatier, Laboratoire Hétérochimie Fondamentale et Appliquée (LHFA, UMR 5069).  
118 Route de Narbonne, 31062 Toulouse Cedex 09 (France)

<sup>b</sup> Institut de Chimie de Toulouse (FR 2599). 118 Route de Narbonne, 31062 Toulouse Cedex 09 (France)

Corresponding Author: [dbouriss@chimie.ups-tlse.fr](mailto:dbouriss@chimie.ups-tlse.fr)

# Contents

|                                                                                                         |     |
|---------------------------------------------------------------------------------------------------------|-----|
| General comments .....                                                                                  | S3  |
| Synthesis, analytical data and NMR spectra of the (Cp)Rh(P,B) complex <b>2</b> .....                    | S4  |
| Synthesis, analytical data and NMR spectra of the (Cp)Rh(P,B)(PMe <sub>3</sub> ) complex <b>3</b> ..... | S12 |
| Synthesis, analytical data and NMR spectra of the (Cp)Rh(P,B)(CNXyl) complex <b>4</b> .....             | S17 |
| Synthesis, analytical data and NMR spectra of the (Cp)Rh(P,B)(CO) complex <b>5</b> .....                | S21 |
| Crystallographic data.....                                                                              | S25 |

## General comments

All reactions and manipulations were carried out under an atmosphere of dry argon using standard Schlenk techniques or a glovebox. All solvents were sparged with argon and dried using an MBRAUN Solvent Purification System (SPS). All solvents were degassed using freeze pump technique.  $^1\text{H}$ ,  $^{13}\text{C}$ ,  $^{31}\text{P}$ ,  $^{11}\text{B}$  and  $^{19}\text{F}$  NMR spectra were recorded on a Bruker Avance III HD 500 (equipped with a prodigy probe), Avance III HD 400, Avance II 300 and Avance I 300 spectrometers. Chemical shifts are expressed with a positive sign, in parts per million, calibrated to residual  $^1\text{H}$  and  $^{13}\text{C}$  solvent signals. External  $\text{BF}_3\cdot\text{OEt}_2$ , 85%  $\text{H}_3\text{PO}_4$  and  $\text{CFCl}_3$  were used as reference for  $^{11}\text{B}$ ,  $^{31}\text{P}$  and  $^{19}\text{F}$  NMR respectively. Mass spectra were recorded on a Waters LCT mass spectrometer. Elemental analyses were recorded on a ThermoFisher Flash 1112 hosted at Centre Régional de Mesures Physiques de l'Ouest. IR spectroscopy was recorded on a IR-TF Thermo Scientific™ Nicolet™ iS™ 50 using a  $\text{CaF}_2$  cuvette.

Ligand **1** was prepared following the reported procedure.<sup>1</sup> All others reagents were purchased from Sigma-Aldrich or Fluorochem and used as received. TICp was sublimed just before used.

The Fxyl and Xyl abbreviations are used for the 3,5-bis(trifluoromethyl)phenyl and 2,6-dimethylphenyl substituent, respectively.

---

<sup>1</sup> Boudjelel, M. ; Carrizo, E. D. S.; Mallet–Ladeira, S.; Massou, S.; Miqueu, M.; Bouhadir, G.; Bourissou, D. *ACS Catal.* **2018**, *8*, 4459–4464.



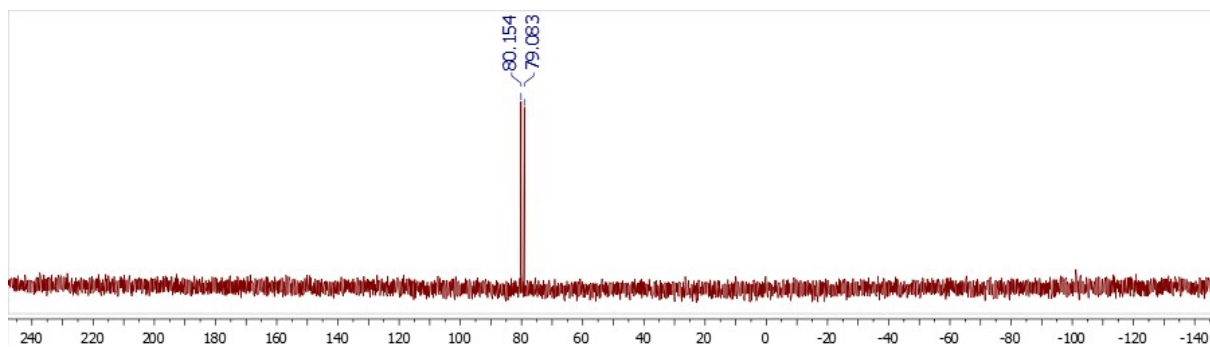

**Figure S1.**  $^{31}\text{P}\{^1\text{H}\}$  NMR spectrum of **2** (171 MHz, 293K) in  $\text{CD}_2\text{Cl}_2$

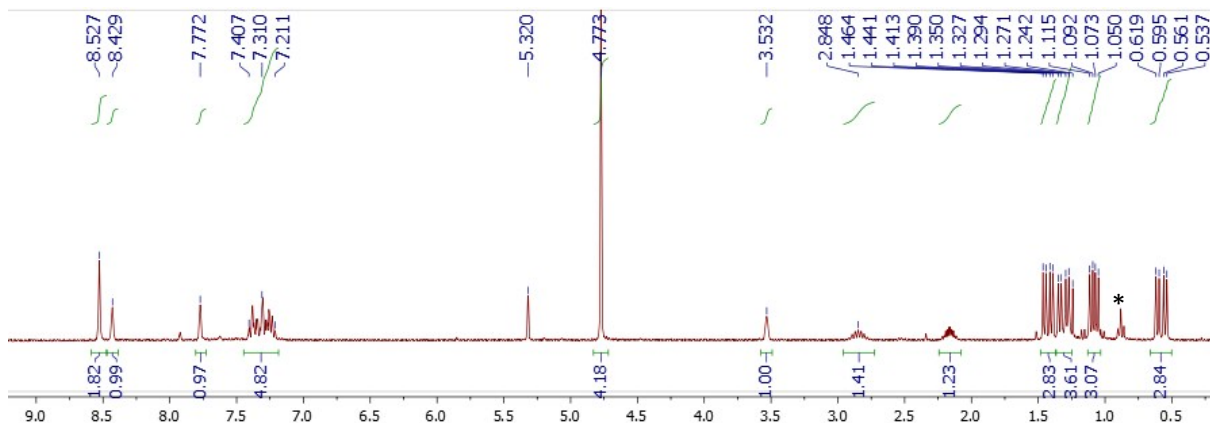

\* Pentane

**Figure S2.**  $^1\text{H}$  NMR spectrum of **2** (300 MHz, 293K) in  $\text{CD}_2\text{Cl}_2$

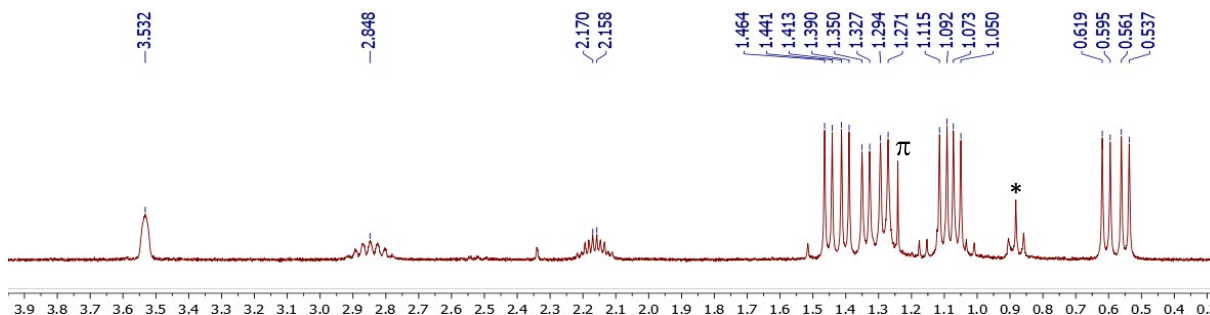

\* Pentane,  $\pi$  unidentified impurity.

**Figure S3.**  $^1\text{H}$  NMR spectrum of **2** (300 MHz, 293K) in  $\text{CD}_2\text{Cl}_2$ , aliphatic region

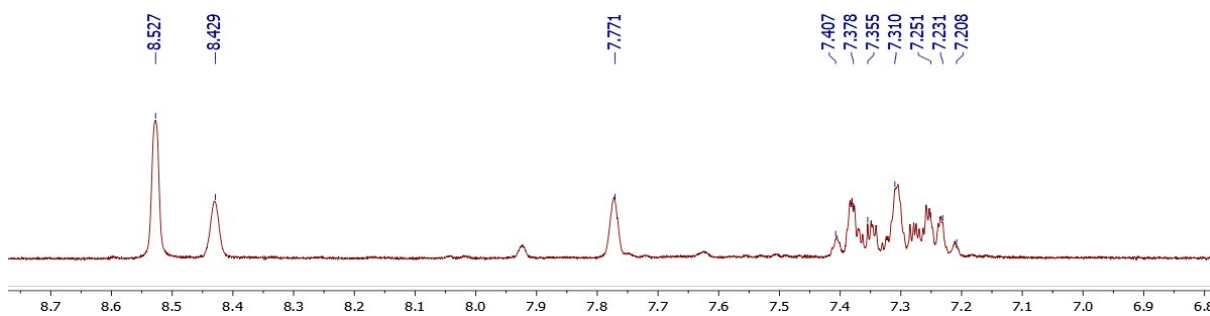

**Figure S4.**  $^1\text{H}$  NMR spectrum of **2** (300 MHz, 293K) in  $\text{CD}_2\text{Cl}_2$ , aromatic region

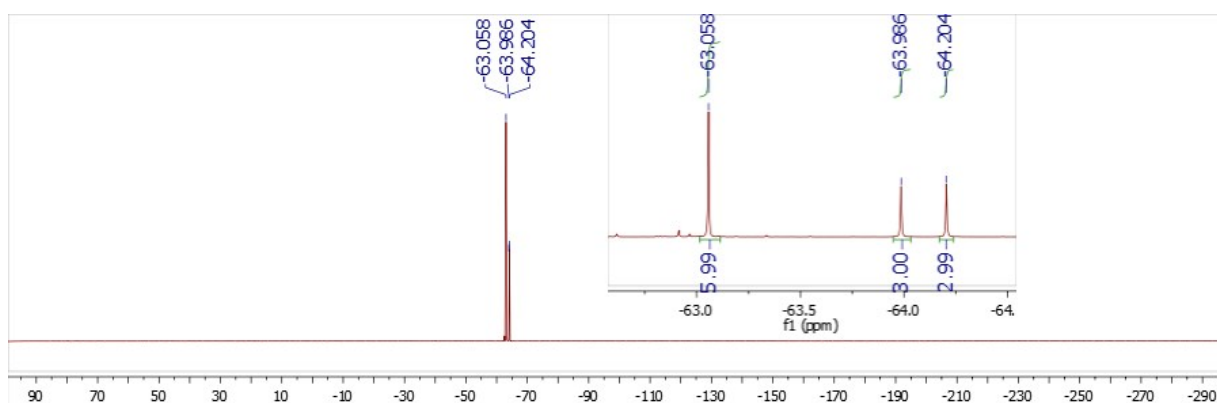

**Figure S5.**  $^{19}\text{F}$  NMR spectrum of **2** (376 MHz, 293K) in  $\text{CD}_2\text{Cl}_2$

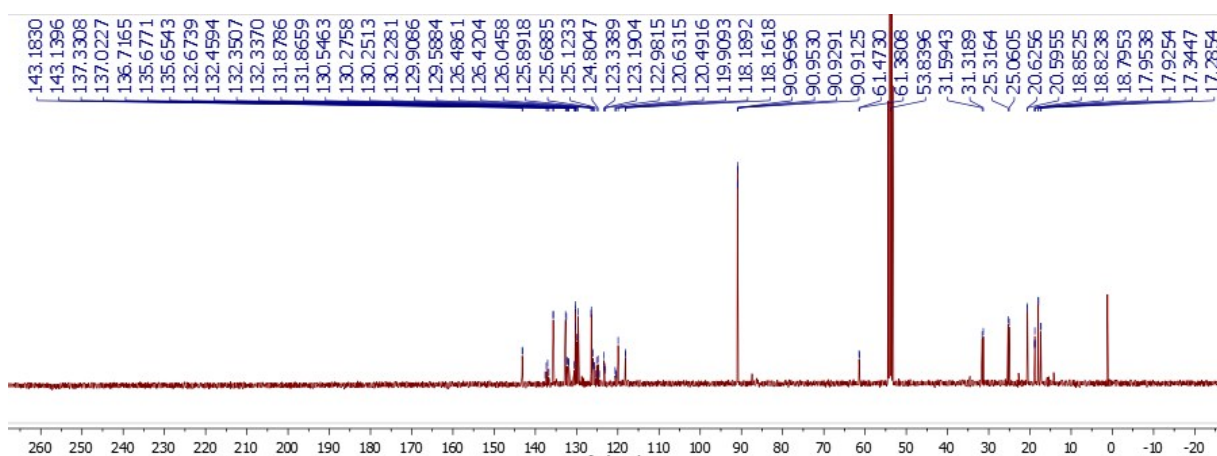

**Figure S6.**  $^{13}\text{C}\{^1\text{H}\}$  spectrum of **2** (100 MHz, 293K) in  $\text{CD}_2\text{Cl}_2$

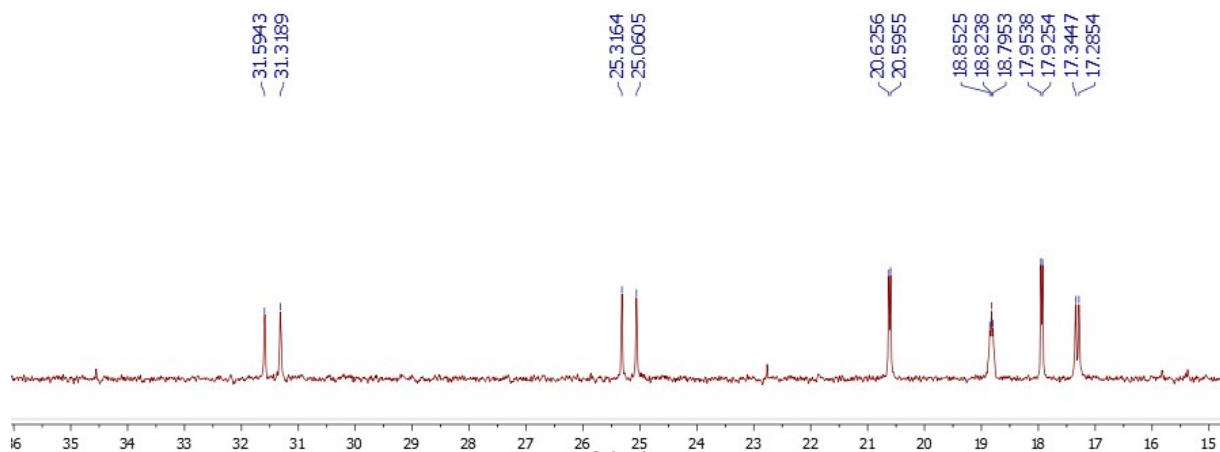

**Figure S7.**  $^{13}\text{C}\{^1\text{H}\}$  spectrum of **2** (100 MHz, 293K) in  $\text{CD}_2\text{Cl}_2$ ; aliphatic region

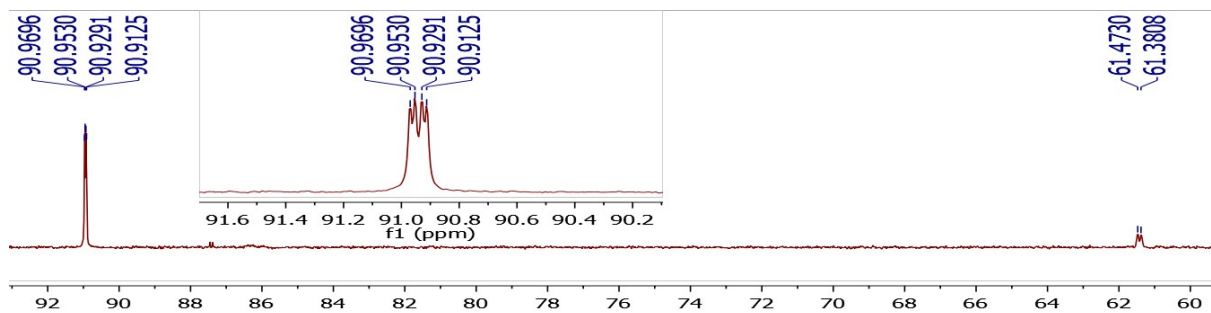

**Figure S8.**  $^{13}\text{C}\{^1\text{H}\}$  spectrum of **2** (100 MHz, 293K) in  $\text{CD}_2\text{Cl}_2$ ; Cp region

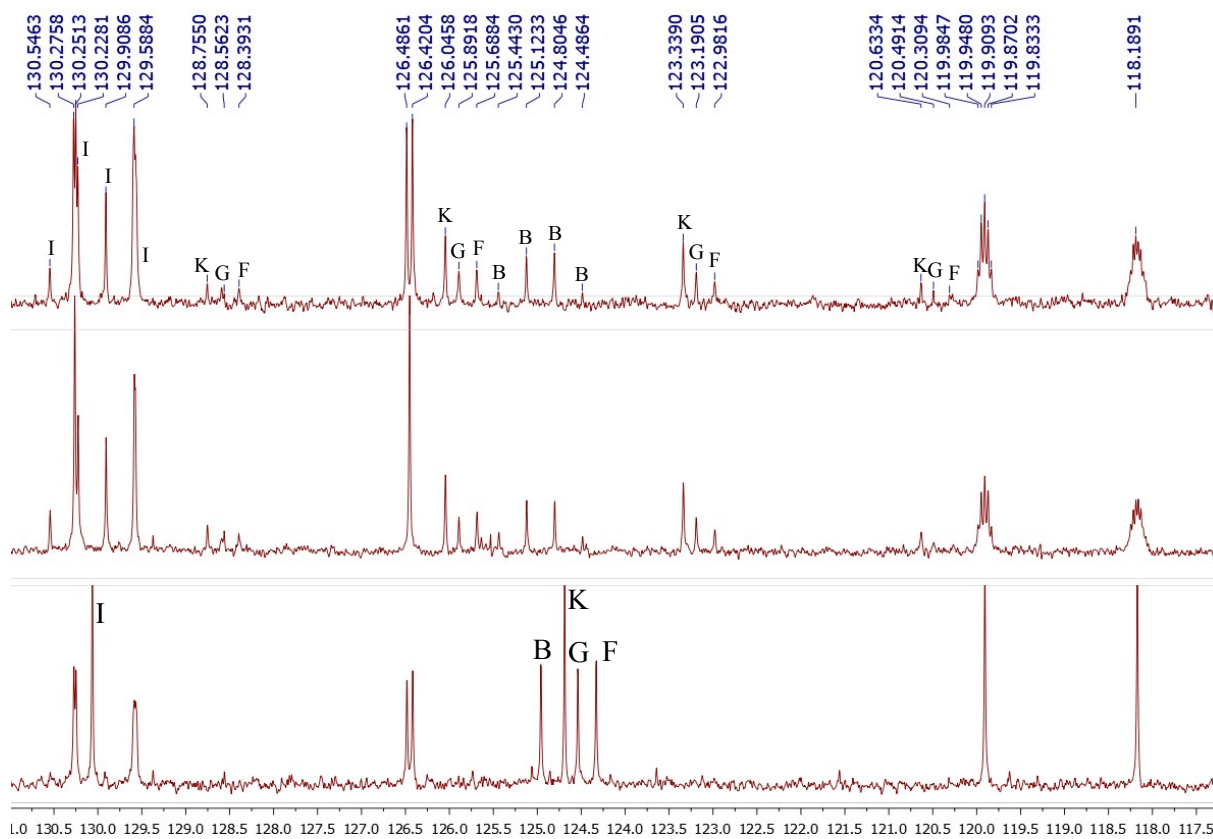

**Figure S9.**  $^{13}\text{C}\{^1\text{H}\}$  spectrum of **2** (100 MHz, 293K) in  $\text{CD}_2\text{Cl}_2$ ; aromatic region, zoom 1 Top  $^{13}\text{C}\{^1\text{H}\}$ , middle  $^{13}\text{C}\{^1\text{H}, ^{31}\text{P}\}$ , bottom  $^{13}\text{C}\{^1\text{H}, ^{19}\text{F}\}$ .

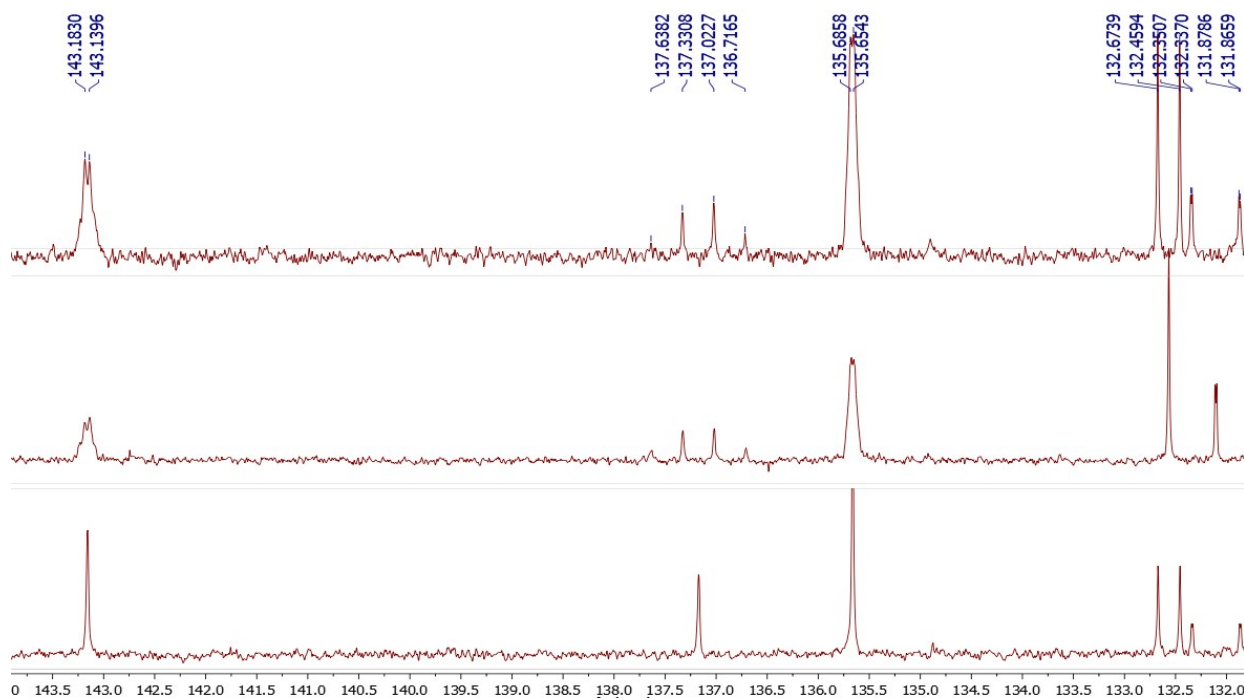

**Figure S10.**  $^{13}\text{C}\{^1\text{H}\}$  spectrum of **2** (100 MHz, 293K) in  $\text{CD}_2\text{Cl}_2$ ; aromatic region, zoom 2  
 Top  $^{13}\text{C}\{^1\text{H}\}$ , middle  $^{13}\text{C}\{^1\text{H},^{31}\text{P}\}$ , bottom  $^{13}\text{C}\{^1\text{H},^{19}\text{F}\}$ .

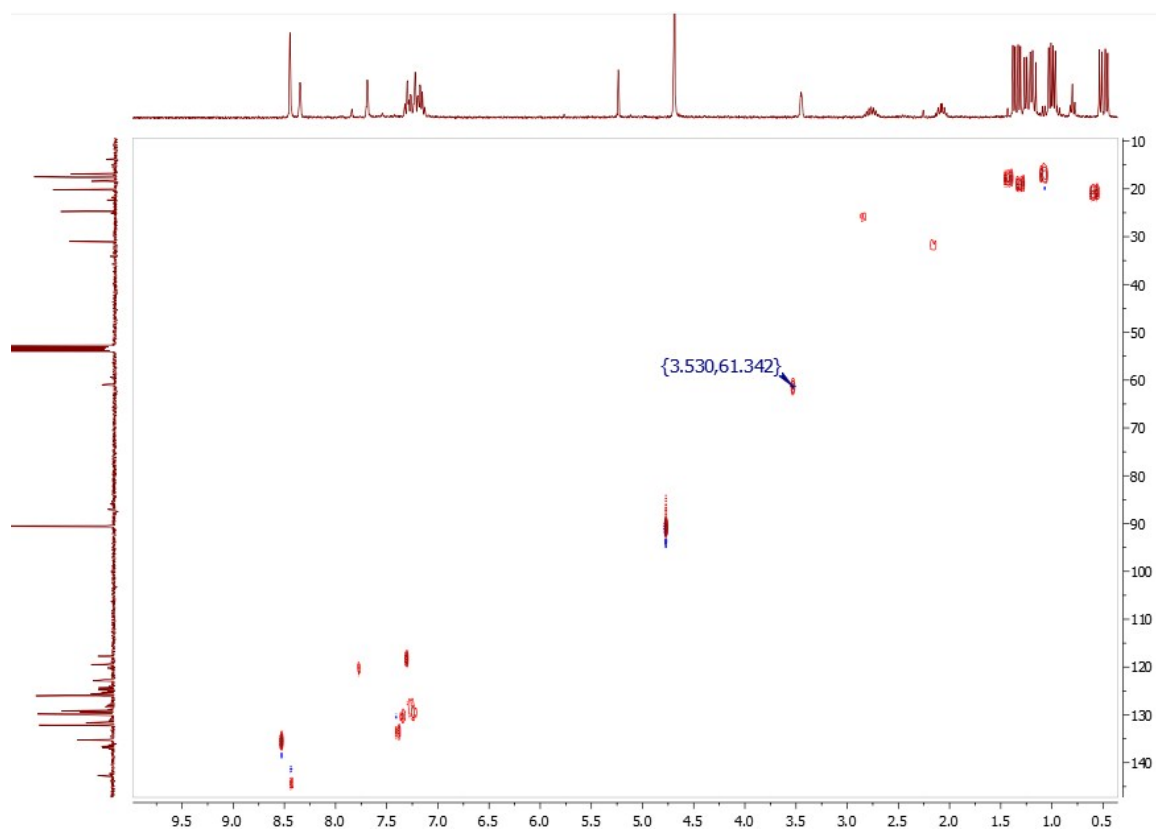

**Figure S11.** HSQC  $\{^1\text{H},^{13}\text{C}\}$  spectrum of **2** in  $\text{CD}_2\text{Cl}_2$



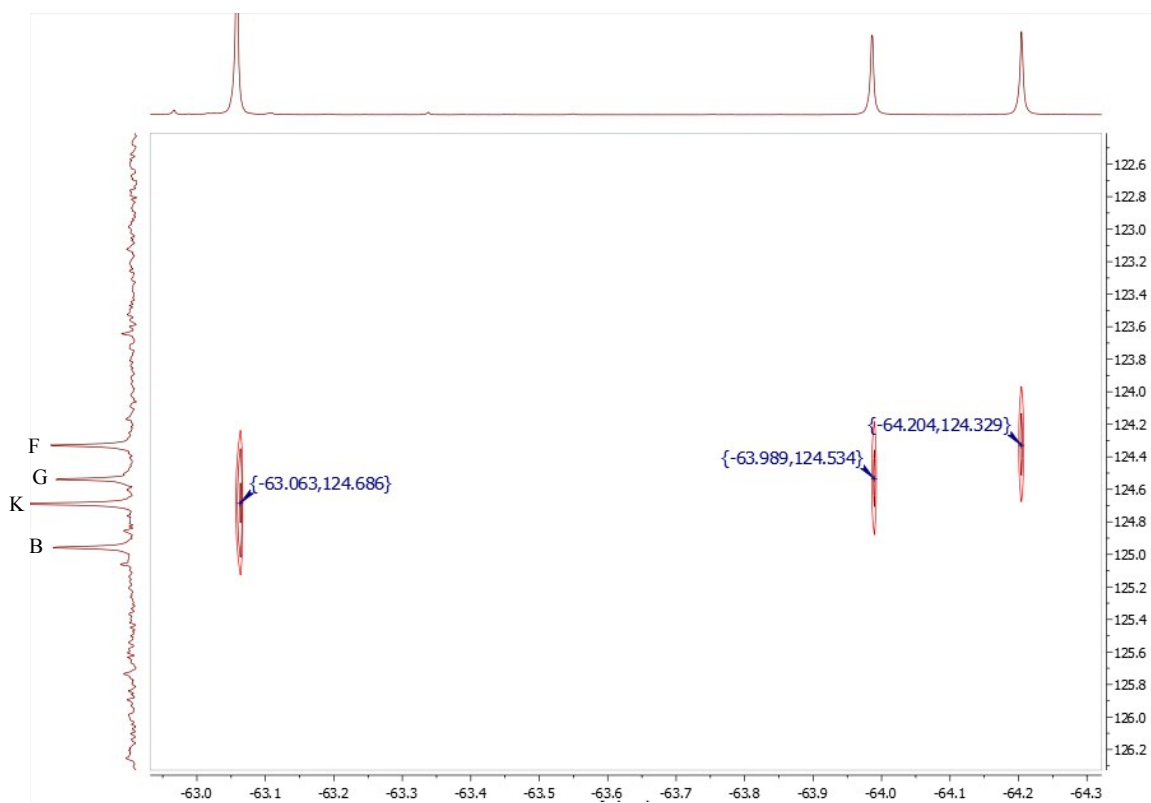

**Figure S12.** HSQC  $\{^{13}\text{C};^{19}\text{F}\}$  ( $J_{\text{XH}} = 280$  Hz) spectrum of **2** in  $\text{CD}_2\text{Cl}_2$ . Projection along x-axis:  $^{19}\text{F}\{^1\text{H}\}$ , projection along y-axis:  $^{13}\text{C}\{^1\text{H},^{19}\text{F}\}$ . Zoom  $\text{CF}_3$  region.

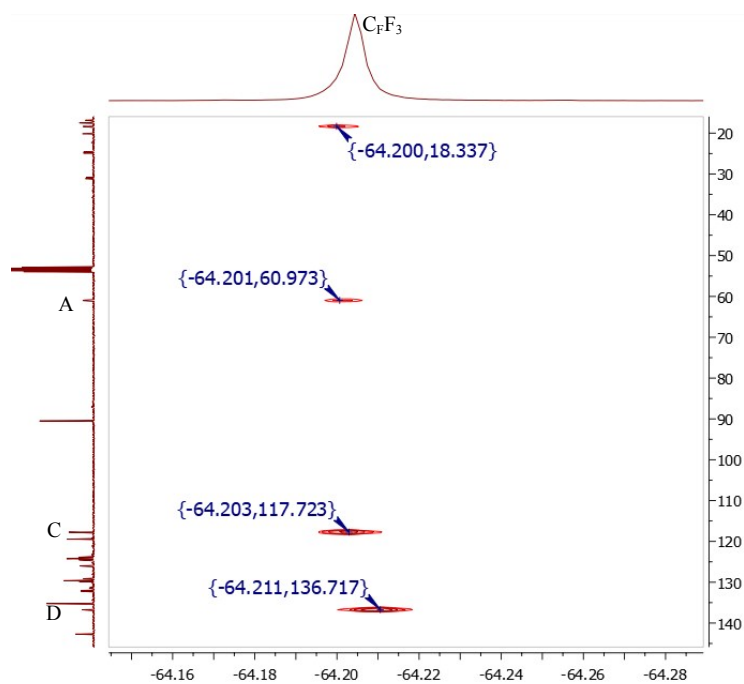

**Figure S13.** HSQC  $\{^{13}\text{C};^{19}\text{F}\}$  ( $J_{\text{XH}} = 10$  Hz) spectrum of **2** in  $\text{CD}_2\text{Cl}_2$ . Projection along x-axis:  $^{19}\text{F}\{^1\text{H}\}$ , projection along y-axis:  $^{13}\text{C}\{^1\text{H},^{19}\text{F}\}$ . Zoom  $\text{CF}_3$  region.

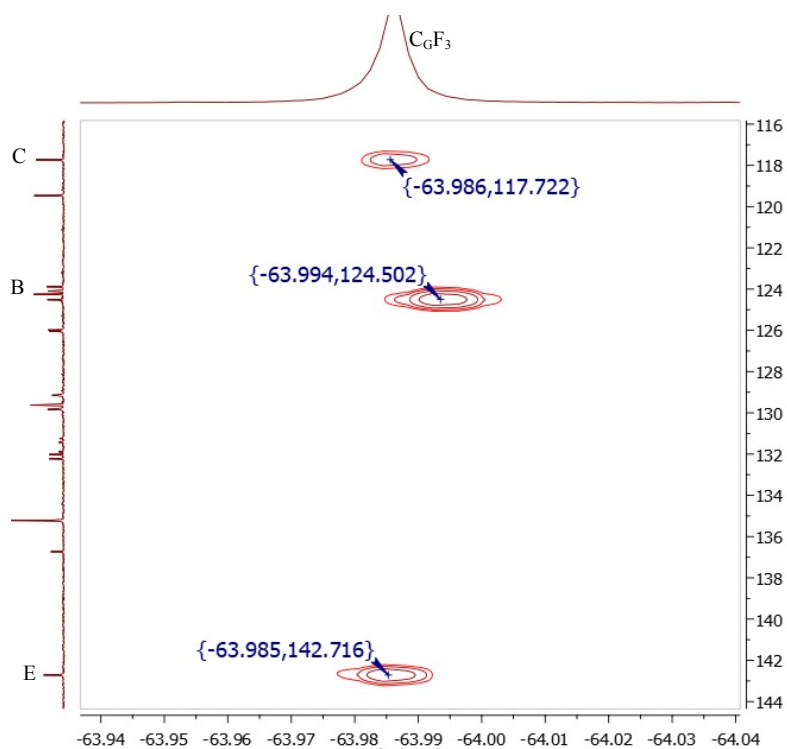

**Figure S14.** HSQC  $\{^{13}\text{C}, ^{19}\text{F}\}$  ( $J_{\text{XH}} = 10$  Hz) spectrum of **2** in  $\text{CD}_2\text{Cl}_2$ . Projection along x-axis:  $^{19}\text{F}\{^1\text{H}\}$ , projection along y-axis:  $^{13}\text{C}\{^1\text{H}, ^{19}\text{F}\}$ . Zoom  $\text{C}_\text{G}\text{F}_3$  region.

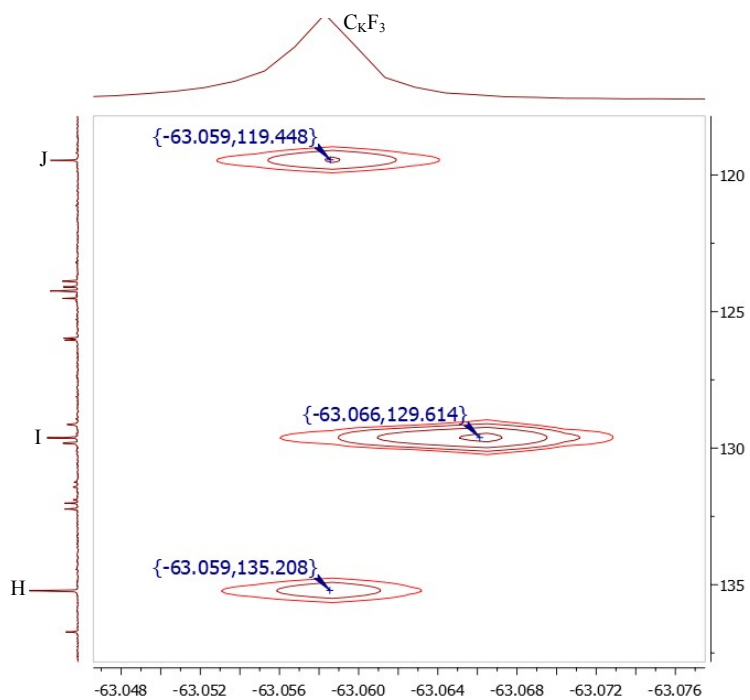

**Figure S15.** HSQC  $\{^{13}\text{C}, ^{19}\text{F}\}$  ( $J_{\text{XH}} = 10$  Hz) spectrum of **2** in  $\text{CD}_2\text{Cl}_2$ . Projection along x-axis:  $^{19}\text{F}\{^1\text{H}\}$ , projection along y-axis:  $^{13}\text{C}\{^1\text{H}, ^{19}\text{F}\}$ . Zoom  $\text{C}_\text{K}\text{F}_3$  region.

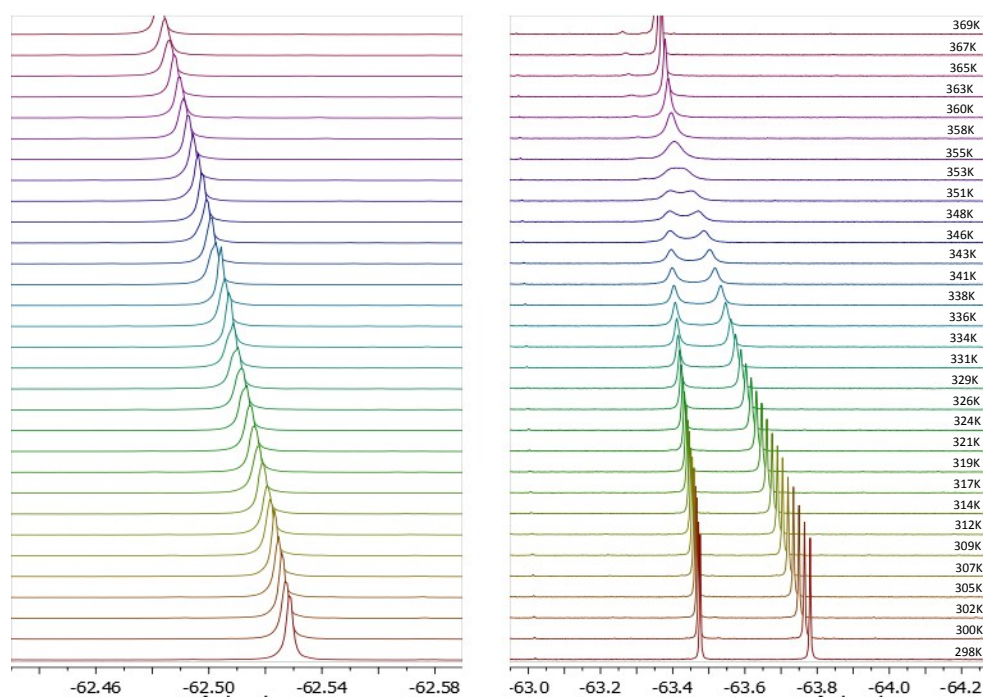

**Figure S16.** VT NMR  $^{19}\text{F}\{^1\text{H}\}$  study of two  $\text{CF}_3$  area in toluene- $d_8$ .

Ethylene glycol was used as an external standard for the calibration of the temperature.<sup>2</sup>  
The free energy of activation was estimated using the following formula:

$$\Delta G^\ddagger = RT_c \ln[RT_c \sqrt{2} / (\pi N_A h |v_A - v_B|)]$$

with R (gas constant),  $T_c$  (coalescence temperature),  $N_A$  (Avogadro's number), h (Planck's constant) and  $|v_A - v_B|$  (chemical shift difference).

where  $T_c = 351 \text{ K}$  and  $|v_A - v_B| = 21 \text{ Hz}$ ; therefore  $\Delta G^\ddagger = 18.0 \text{ kcal.mol}^{-1}$

<sup>2</sup> Ammann, C.; Meier, P.; Merbarch, A. *J. Magn. Reson.* **1982**, *46*, 319-321.

### Synthesis of the (Cp)Rh(P,B)(PMe<sub>3</sub>) complex **3**

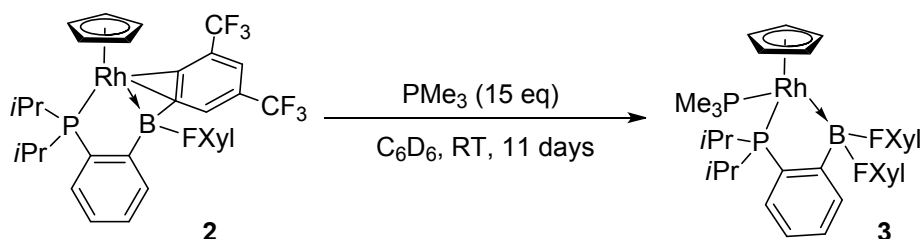

**2** (20 mg, 0.025 mmol) was dissolved in 0.5 mL of C<sub>6</sub>D<sub>6</sub> and charged in a pressure J. Young NMR tube. PMe<sub>3</sub> was added neat (38.6 μL, 0.375 mmol). The NMR tube was then left for 11 days. The excess of phosphine was removed under vacuum. Then the residue was re-dissolved in 0.5 mL of C<sub>6</sub>D<sub>6</sub> and directly analysed by multinuclear NMR. X-Ray quality crystals were obtained by slow evaporation of a concentrated pentane solution.

NB: Higher temperatures gave less clean reactions. The excess of phosphine permitted to accelerate the reaction. Attempts to purify the complex led to degradation.

HRMS (ES-MS<sup>+</sup>): exact mass (monoisotopic) calcd. for [M]<sup>+</sup> (C<sub>36</sub>H<sub>38</sub>P<sub>2</sub>F<sub>12</sub>BRh)<sup>+</sup>: 874.1412; found, 874.1409.

<sup>1</sup>H NMR (400 MHz, C<sub>6</sub>D<sub>6</sub>, 293K, δ): 0.19 (dd, 9H, <sup>2</sup>J<sub>HP</sub> = 9.2 Hz, <sup>3</sup>J<sub>RhH</sub> = 0.8 Hz, PMe<sub>3</sub>), 0.92 (dd, <sup>3</sup>J<sub>HP</sub> = 11.2 Hz, <sup>3</sup>J<sub>HH</sub> = 7.2 Hz, 3H, CH<sub>3iPr</sub>), 0.93 (dd, <sup>3</sup>J<sub>HP</sub> = 10.0 Hz, <sup>3</sup>J<sub>HH</sub> = 7.6 Hz, 3H, CH<sub>3iPr</sub>), 0.95 (dd, <sup>3</sup>J<sub>HP</sub> = 12.2 Hz, <sup>3</sup>J<sub>HH</sub> = 8.0 Hz, 3H, CH<sub>3iPr</sub>), 1.15 (dd, 3H, <sup>3</sup>J<sub>HP</sub> = 12.8 Hz, <sup>3</sup>J<sub>HH</sub> = 6.8 Hz, CH<sub>3iPr</sub>), 1.70 (pseudo-oct, 1H, <sup>2</sup>J<sub>HP</sub> = <sup>3</sup>J<sub>HH</sub> = 7.2 Hz, CH<sub>iPr</sub>), 2.31 (pseudo-oct, 1H, <sup>2</sup>J<sub>HP</sub> = <sup>3</sup>J<sub>HH</sub> = 7.2 Hz, CH<sub>iPr</sub>), 4.80 (s, 5H, Cp), 6.96 (m, 1H, H<sub>arom</sub>), 7.09 (m, 1H, H<sub>arom</sub>), 7.27 (t, 1H, J<sub>HH</sub> = 6.8 Hz, H<sub>arom</sub>), 7.39 (d, 1H, J<sub>HH</sub> = 7.6 Hz, H<sub>arom</sub>), 7.62 (s br, 1H, H<sub>Fxyl para</sub>), 7.68 (s br, 1H, H<sub>Fxyl para</sub>), 8.09 (s br, 2H, H<sub>Fxyl ortho</sub>), 8.43 (s br, 2H, H<sub>Fxyl ortho</sub>)

<sup>13</sup>C {<sup>1</sup>H} NMR (100 MHz, C<sub>6</sub>D<sub>6</sub>, 293K, δ): 19.99 (s, CH<sub>3iPr</sub>), 21.05 (d, <sup>1</sup>J<sub>CP</sub> = 30.3 Hz, PMe<sub>3</sub>), 21.13 (s, CH<sub>3iPr</sub>), 21.42 (s, CH<sub>3iPr</sub>), 23.57 (s, CH<sub>3iPr</sub>), 26.59 (d, <sup>1</sup>J<sub>CP</sub> = 21.6 Hz, CH<sub>iPr</sub>), 35.60 (d, <sup>1</sup>J<sub>CP</sub> = 22.2 Hz, CH<sub>iPr</sub>), 92.53 (m, Cp), 117.33 (m, CH<sub>para</sub> Fxyl), 117.88 (m, CH<sub>para</sub> Fxyl), 124.79 (d, J<sub>CP</sub> = 6.2 Hz, CH<sub>arom</sub>), 125.16 (q, <sup>1</sup>J<sub>CF</sub> = 271.3 Hz, 4CF<sub>3</sub>), 129.91 (s, CH<sub>arom</sub>), 131.26 (s, CH<sub>arom</sub>), 134.30 (s br, 2CH<sub>ortho</sub> Fxyl), 135.23 (d, J<sub>CP</sub> = 22.1 Hz, CH<sub>arom</sub>), 135.46 (s br, 2CH<sub>ortho</sub> Fxyl), 142.06 (d, <sup>1</sup>J<sub>CP</sub> = 45.2 Hz, C<sub>ipso</sub>P).

N.B.: C<sub>ipso</sub>B quaternary carbon atoms were not observed and C-CF<sub>3</sub> carbons are under the residual signal of benzene.

N.B.: Impurity signals in the aliphatic area are due to the use of an excess of PMe<sub>3</sub>.

<sup>11</sup>B NMR (128.4 MHz, C<sub>6</sub>D<sub>6</sub>, 293K, δ): 4.58 (s br)

<sup>31</sup>P {<sup>1</sup>H} NMR (121 MHz, C<sub>6</sub>D<sub>6</sub>, 293K, δ): -2.45 (dd, <sup>2</sup>J<sub>PP</sub> = 50.3 Hz, <sup>1</sup>J<sub>PRh</sub> = 179.9 Hz, PMe<sub>3</sub>), 81.22 (dd, <sup>2</sup>J<sub>PP</sub> = 50.0 Hz, <sup>1</sup>J<sub>PRh</sub> = 169.3 Hz, PiPr<sub>2</sub>)

<sup>19</sup>F {<sup>1</sup>H} NMR (282.4 MHz, C<sub>6</sub>D<sub>6</sub>, 293K, δ): -62.46 (s, 2CF<sub>3</sub>), -62.33 (s, 2CF<sub>3</sub>).

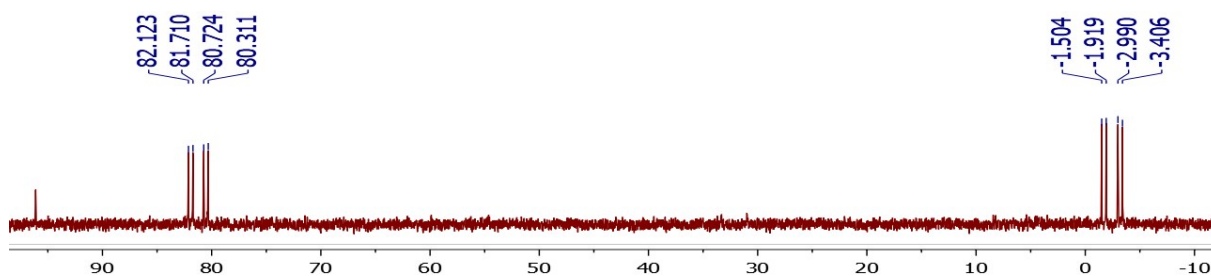

**Figure S17.**  $^{31}\text{P}$  NMR spectrum of **3** (121 MHz, 293K) in  $\text{C}_6\text{D}_6$

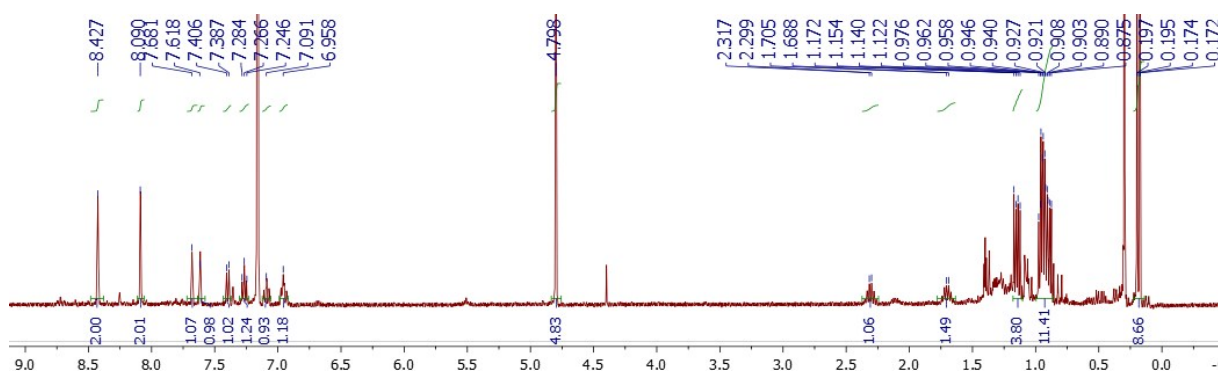

**Figure S18.**  $^1\text{H}$  NMR spectrum of **3** (400 MHz, 293K) in  $\text{C}_6\text{D}_6$

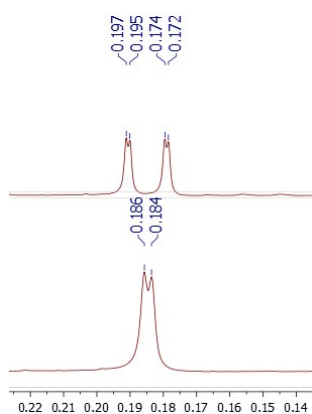

**Figure S19.**  $^1\text{H}$  NMR spectrum of **3** (400 MHz, 293K) in  $\text{C}_6\text{D}_6$ ,  $\text{PMe}_3$  region. Top  $^1\text{H}$ , bottom  $^1\text{H}\{^{31}\text{P}\}$  O2p = 0 ppm.

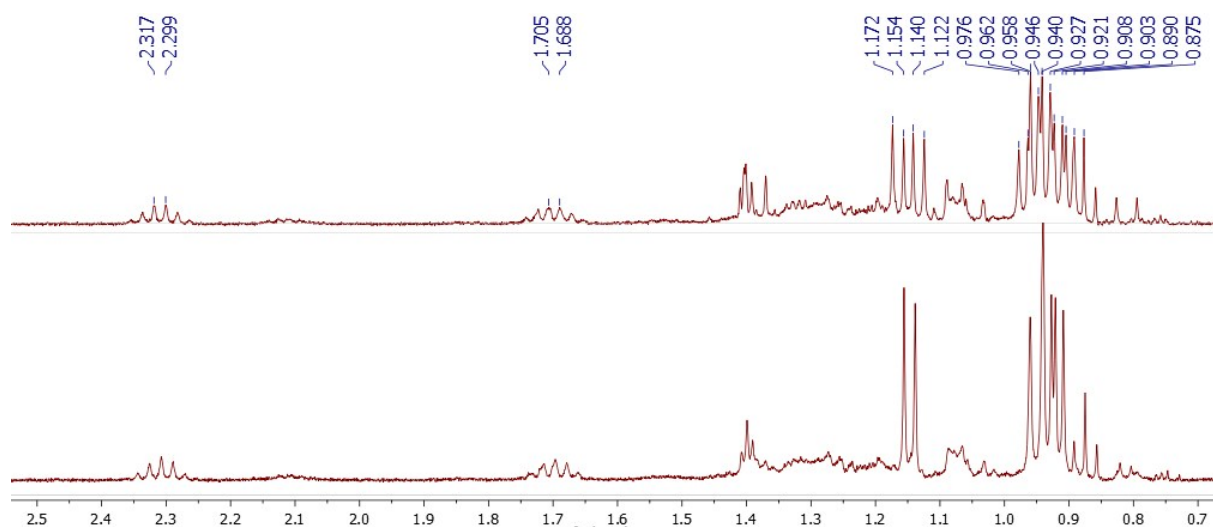

**Figure S20.**  $^1\text{H}$  NMR spectrum of **3** (400 MHz, 293K) in  $\text{C}_6\text{D}_6$ , aliphatic region. Top  $^1\text{H}$ , bottom  $^1\text{H}\{^{31}\text{P}\}$  O2p = 80 ppm.

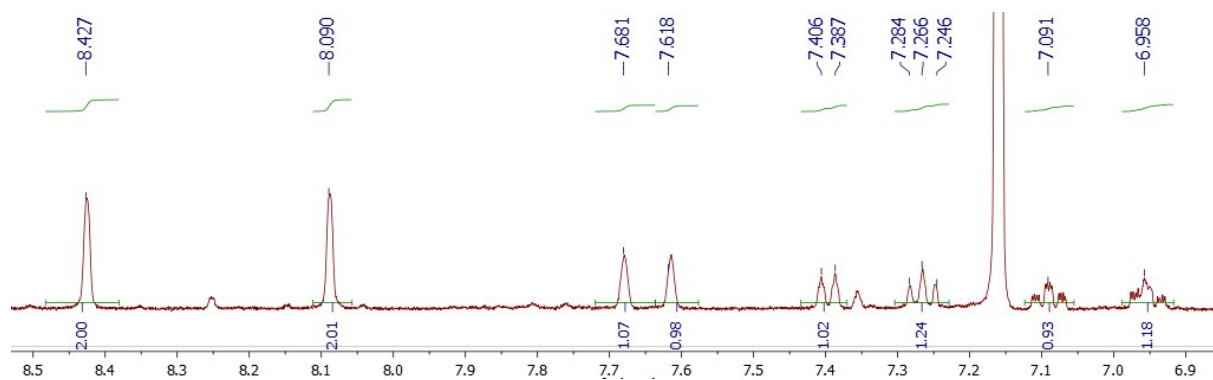

**Figure S21.**  $^1\text{H}$  NMR spectrum of **3** (400 MHz, 293K) in  $\text{C}_6\text{D}_6$ , aromatic region

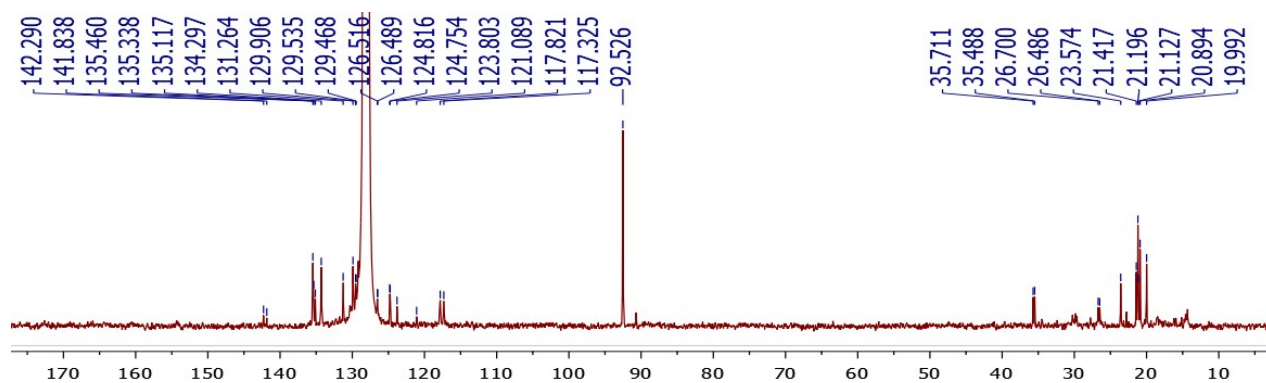

**Figure S22.**  $^{13}\text{C}$  NMR spectrum of **3** (100 MHz, 293K) in  $\text{C}_6\text{D}_6$

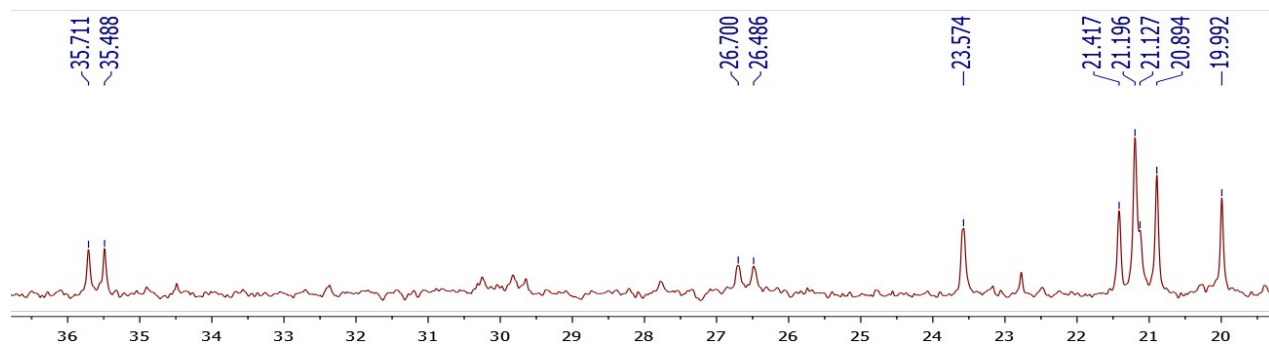

**Figure S23.**  $^{13}\text{C}$  NMR spectrum of **3** (100 MHz, 293K) in  $\text{C}_6\text{D}_6$ , aliphatic region

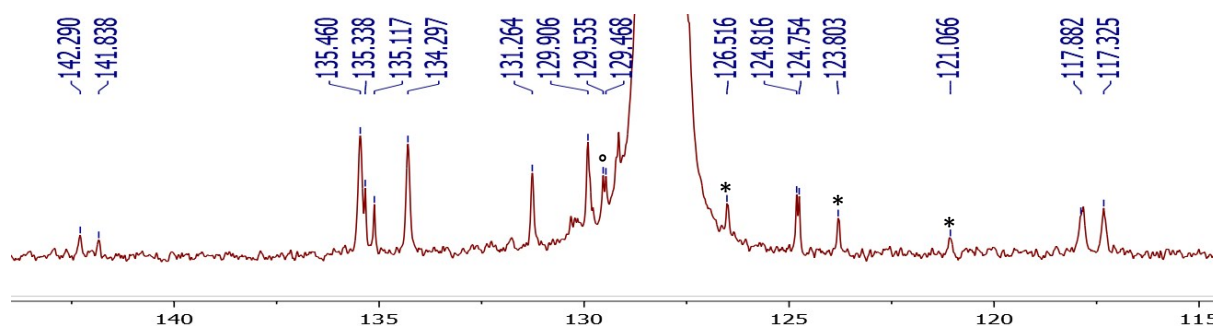

**Figure S24.**  $^{13}\text{C}$  NMR spectrum of **3** (100 MHz, 293K) in  $\text{C}_6\text{D}_6$ , aromatic region

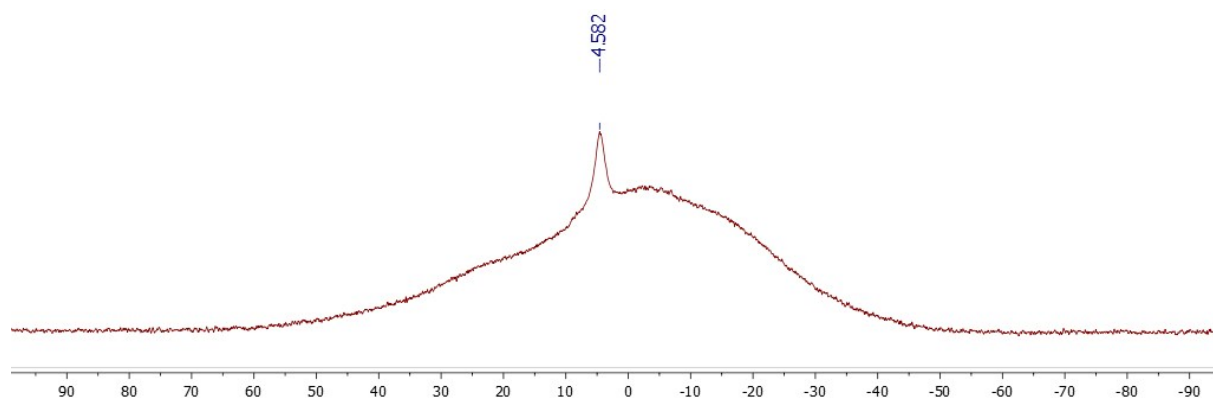

**Figure S25.**  $^{11}\text{B}$  NMR spectrum of **3** (128.4 MHz, 293K) in  $\text{C}_6\text{D}_6$

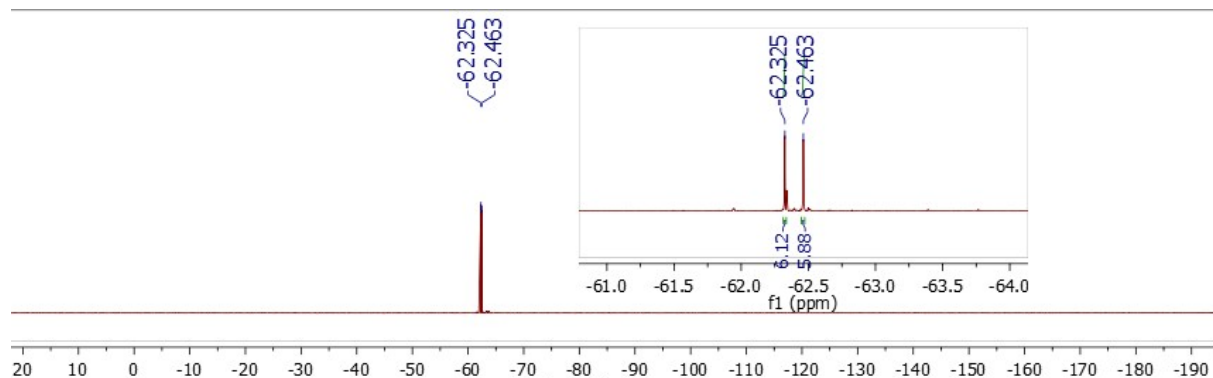

**Figure S26.**  $^{19}\text{F}$  NMR spectrum of **3** (282.4 MHz, 293K) in  $\text{C}_6\text{D}_6$

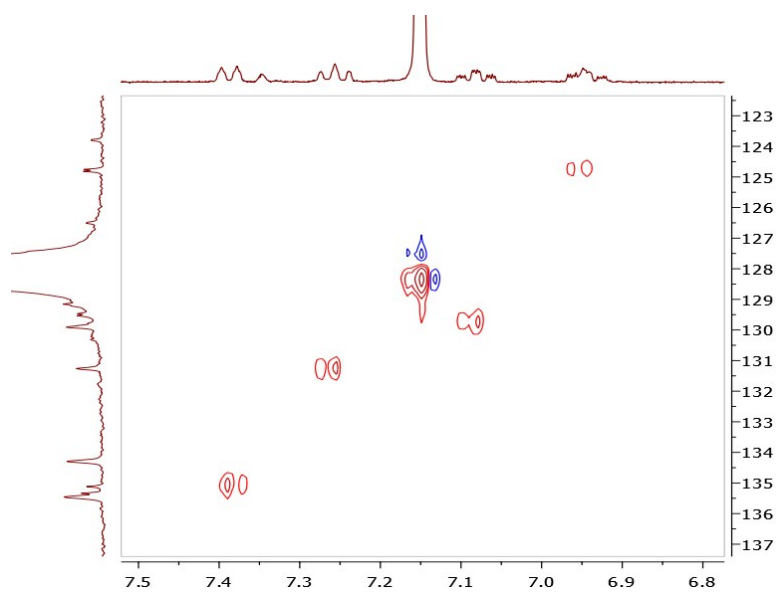

**Figure S27.** HSQC of **3** in  $C_6D_6$ ,  $CH_{arom}$  region

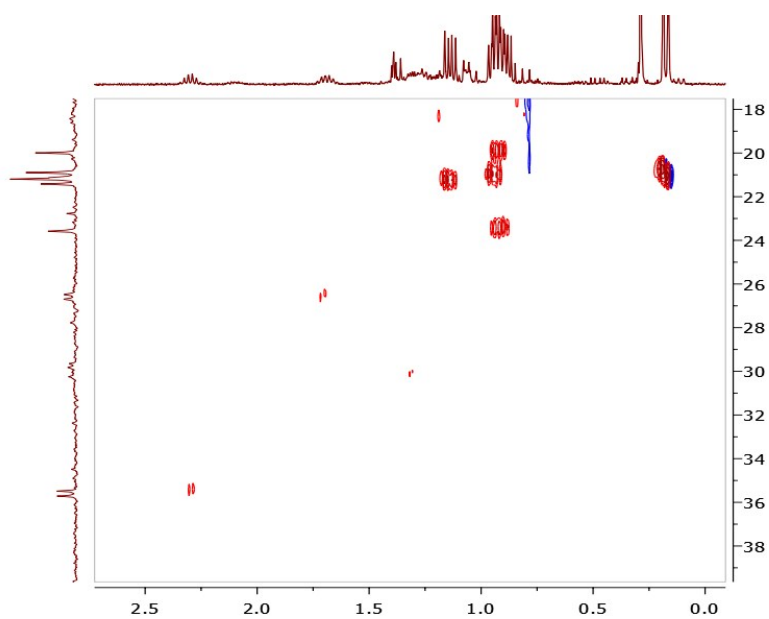

**Figure S28.** HSQC of **3** in  $C_6D_6$ , aliphatic region



## Synthesis of the (Cp)Rh(P,B)(CNXyl) complex **4**

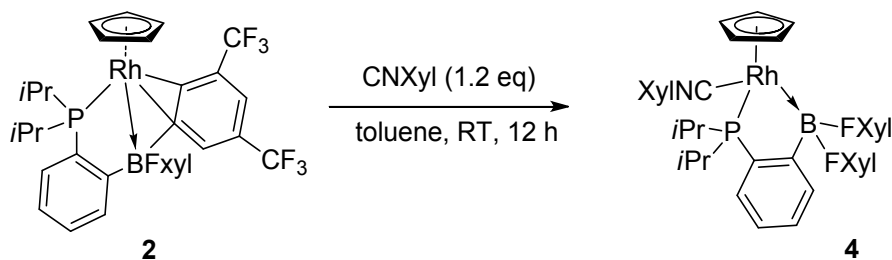

**2** (20 mg, 0.025 mmol) and CNXyl (4 mg, 0.030 mmol) were dissolved in 0.5 mL of toluene and charged in a J. Young NMR tube. After 12 hours, the clear yellow solution was evaporated to afford a fluffy yellow solid. The solid was washed with 0.2 mL of pentane in order to remove the excess of CNXyl. After drying under vacuum, 19.7 mg of a yellow powder were obtained (85% yield). X-Ray quality crystals were obtained by slow evaporation of a concentrated pentane solution at room temperature.

HRMS (ES-MS<sup>+</sup>): exact mass (monoisotopic) calcd. for [M]<sup>+</sup> (C<sub>42</sub>H<sub>38</sub>PF<sub>12</sub>BNRh)<sup>+</sup>: 929.1705; found, 929.1691.

m.p.: 166 °C (decomp.).

IR (DCM):  $\nu_{\text{NC}} = 2019 \text{ cm}^{-1}$

<sup>1</sup>H NMR (400 MHz, C<sub>6</sub>D<sub>6</sub>, 293K,  $\delta$ ): 0.79 (dd, 3H, <sup>3</sup>J<sub>HP</sub> = 15.6 Hz, <sup>3</sup>J<sub>HH</sub> = 7.2 Hz, CH<sub>3</sub><sub>*i*Pr</sub>), 0.82 (dd, 3H, <sup>3</sup>J<sub>HP</sub> = 13.2 Hz, <sup>3</sup>J<sub>HH</sub> = 7.2 Hz, CH<sub>3</sub><sub>*i*Pr</sub>), 0.87 (dd, 3H, <sup>3</sup>J<sub>HP</sub> = 13.2 Hz, <sup>3</sup>J<sub>HH</sub> = 6.8 Hz, CH<sub>3</sub><sub>*i*Pr</sub>), 0.91 (pseudo t, 3H, <sup>3</sup>J<sub>HP</sub> = 13.2 Hz, <sup>3</sup>J<sub>HH</sub> = 6.4 Hz, CH<sub>3</sub><sub>*i*Pr</sub>), 1.56 (s, 6H, CH<sub>3</sub> Xyl), 1.97 (m, 1H, CH<sub>*i*Pr</sub>), 2.19 (m, 1H, CH<sub>*i*Pr</sub>), 5.11 (s, 5H, Cp), 6.56 (d, 2H, *J*<sub>HH</sub> = 7.6 Hz, H<sub>arom</sub>), 6.68 (m, 1H, H<sub>arom</sub>), 6.92 (m, 1H, H<sub>arom</sub>), 7.05 (m, 2H, H<sub>arom</sub>), 7.43 (m, 1H, H<sub>arom</sub>), 7.52 (s br, 1H, H<sub>Fxyl para</sub>), 7.62 (s br, 1H, H<sub>Fxyl para</sub>), 8.05 (s br, 2H, H<sub>Fxyl ortho</sub>), 8.27 (s br, 2H, H<sub>Fxyl ortho</sub>).

<sup>13</sup>C {<sup>1</sup>H} NMR (100 MHz, C<sub>6</sub>D<sub>6</sub>, 293K,  $\delta$ ): 18.08 (s, 2 CH<sub>3</sub> Xyl), 18.19 (d, <sup>2</sup>J<sub>CP</sub> = 3.8 Hz, CH<sub>3</sub><sub>*i*Pr</sub>), 20.19 (d, <sup>2</sup>J<sub>CP</sub> = 2.3 Hz, CH<sub>3</sub><sub>*i*Pr</sub>), 20.33 (d, <sup>2</sup>J<sub>CP</sub> = 2.8 Hz, CH<sub>3</sub><sub>*i*Pr</sub>), 20.92 (s, CH<sub>3</sub><sub>*i*Pr</sub>), 24.51 (d, <sup>1</sup>J<sub>CP</sub> = 28.0 Hz, CH<sub>*i*Pr</sub>), 30.81 (d, <sup>1</sup>J<sub>CP</sub> = 21.0 Hz, CH<sub>*i*Pr</sub>), 92.29 (m, Cp), 117.95 (m, CH<sub>para</sub> Fxyl), 118.19 (m, CH<sub>para</sub> Fxyl), 124.75 (d, *J*<sub>CP</sub> = 7.0 Hz, CH<sub>arom</sub>), 124.89 (q, <sup>1</sup>J<sub>CF</sub> = 271.0 Hz, CF<sub>3</sub>), 125.02 (q, <sup>1</sup>J<sub>CF</sub> = 271.0 Hz, CF<sub>3</sub>), 129.39 (q, <sup>2</sup>J<sub>CF</sub> = 31.5 Hz, C-CF<sub>3</sub>), 129.50 (q, <sup>2</sup>J<sub>CF</sub> = 31.5 Hz, C-CF<sub>3</sub>), 130.14 (m, 2CH<sub>arom</sub>), 133.78 (d, *J*<sub>CP</sub> = 21.0 Hz, CH<sub>arom</sub>), 133.81 (s, C<sub>quat</sub> Xyl), 134.37 (m, 2 CH<sub>ortho</sub> Fxyl), 134.98 (m, 2CH<sub>ortho</sub> Fxyl), 140.91 (dd, <sup>1</sup>J<sub>CP</sub> = 51.5 Hz, <sup>2</sup>J<sub>CRh</sub> = 3.0 Hz, C<sub>ipso</sub>-P), 158.62 (dd, <sup>1</sup>J<sub>CRh</sub> = 84.0 Hz, <sup>2</sup>J<sub>CP</sub> = 24.4 Hz, CNXyl), 161.41 (br, C<sub>ipso</sub>B), 162.29 (br, C<sub>ipso</sub>B), 167.05 (br, C<sub>ipso</sub>B).

N.B.: Two aromatic CH carbon atoms are under the residual signal of C<sub>6</sub>D<sub>6</sub>.

<sup>11</sup>B NMR (128.4 MHz, C<sub>6</sub>D<sub>6</sub>, 293K,  $\delta$ ): 8.75.

<sup>31</sup>P {<sup>1</sup>H} NMR (121 MHz, C<sub>6</sub>D<sub>6</sub>, 293K,  $\delta$ ): 84.46 (d, <sup>1</sup>J<sub>PRh</sub> = 173.0 Hz).

<sup>19</sup>F NMR (282.4 MHz, C<sub>6</sub>D<sub>6</sub>, 293K,  $\delta$ ): -62.56 (s, 2CF<sub>3</sub>), -62.29 (s, 2CF<sub>3</sub>).

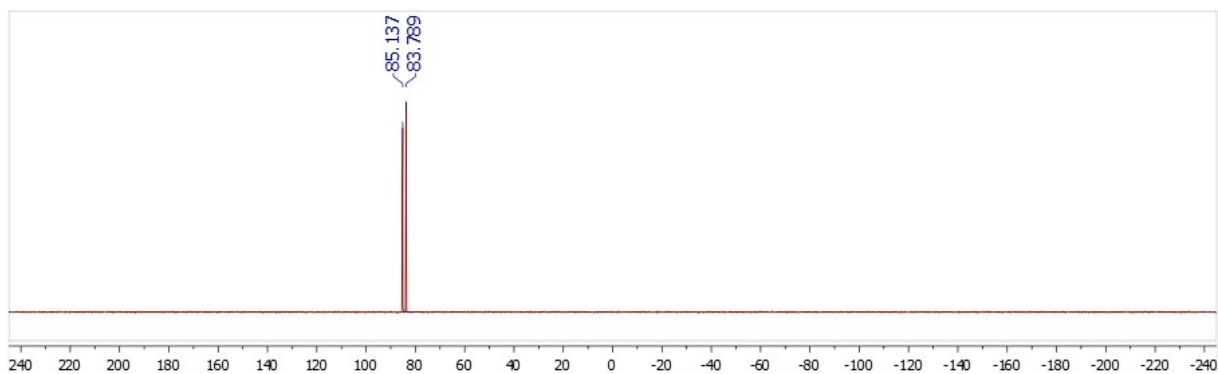

**Figure S29.**  $^{31}\text{P}\{^1\text{H}\}$  NMR spectrum of **4** (128 MHz, 293K) in  $\text{C}_6\text{D}_6$

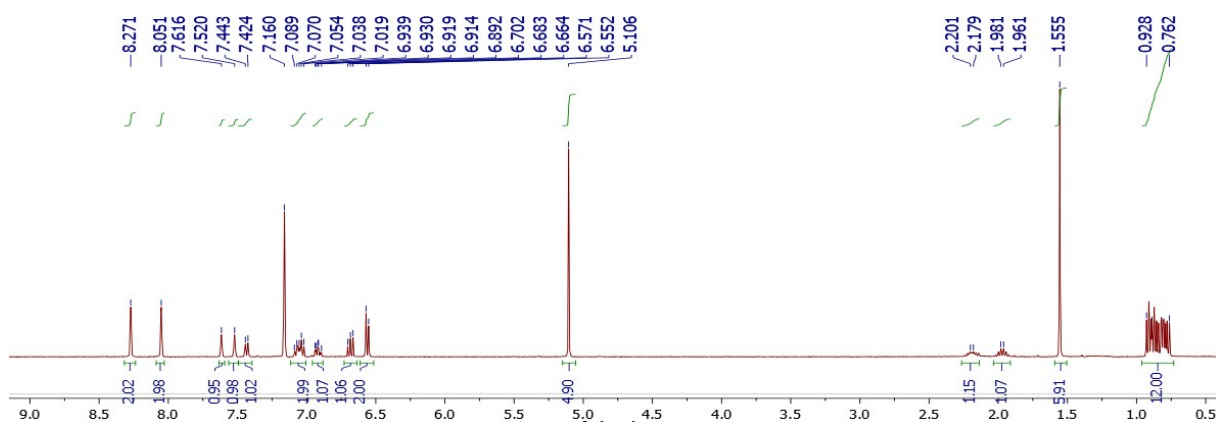

**Figure S30.**  $^1\text{H}$  NMR spectrum of **4** (400 MHz, 293K) in  $\text{C}_6\text{D}_6$

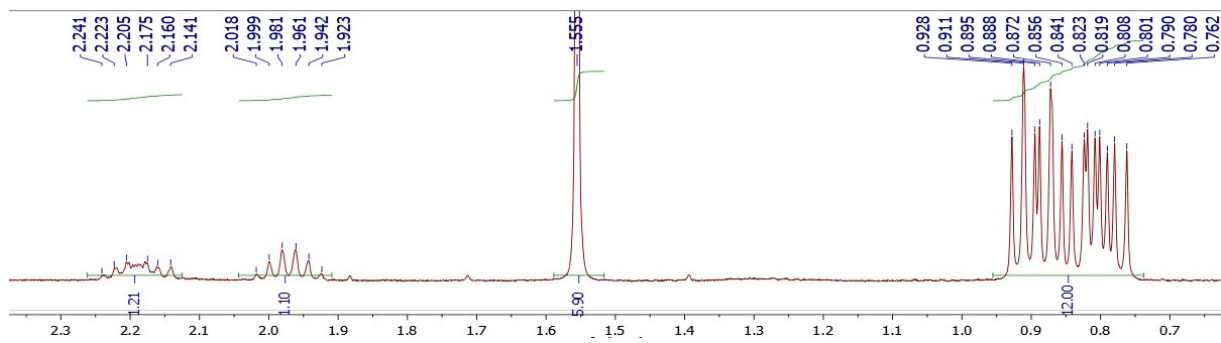

**Figure S31.**  $^1\text{H}$  NMR spectrum of **4** (300 MHz, 293K) in  $\text{C}_6\text{D}_6$ ; aliphatic region

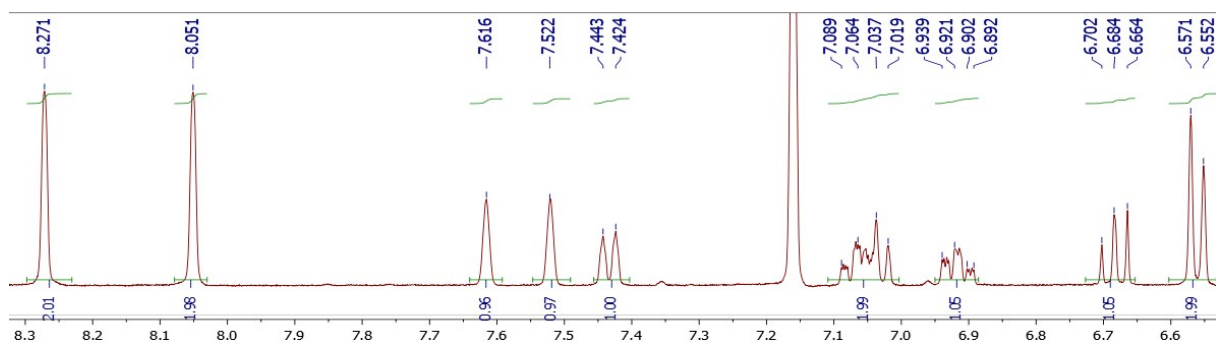

**Figure S32.**  $^1\text{H}$  NMR spectrum of **4** (300 MHz, 293K) in  $\text{C}_6\text{D}_6$ ; aromatic region

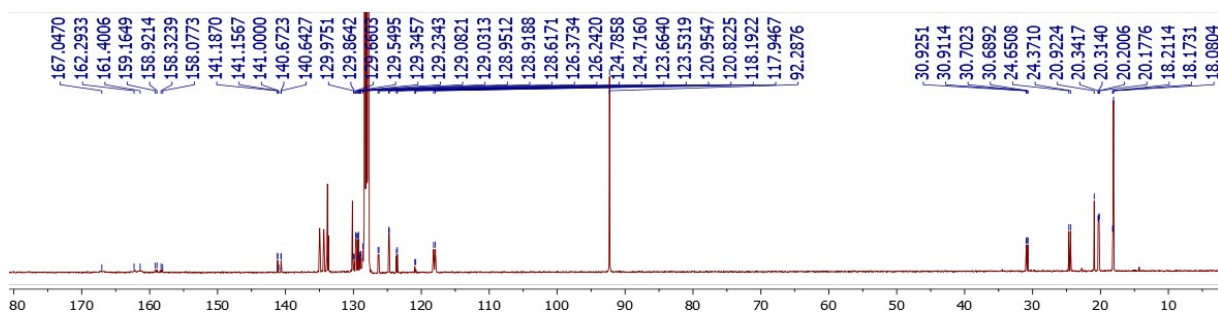

**Figure S33.**  $^{13}\text{C}\{^1\text{H}\}$  spectrum of **4** (100 MHz, 293K) in  $\text{C}_6\text{D}_6$

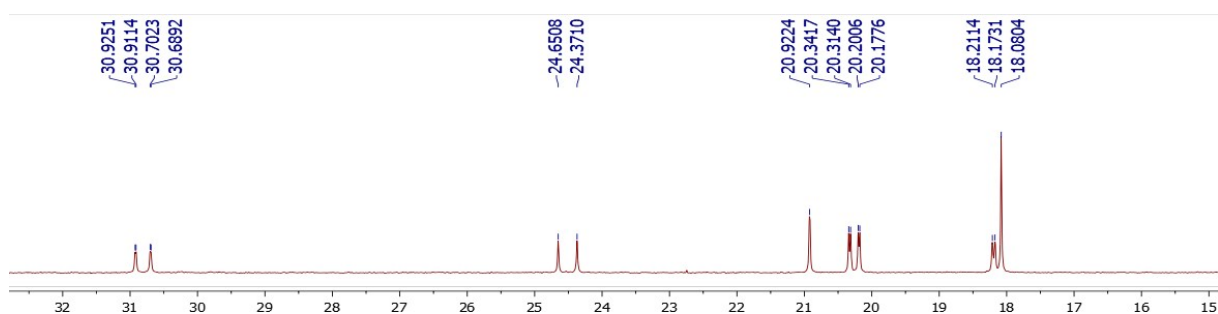

**Figure S34.**  $^{13}\text{C}\{^1\text{H}\}$  spectrum of **4** (100 MHz, 293K) in  $\text{C}_6\text{D}_6$ ; aliphatic region

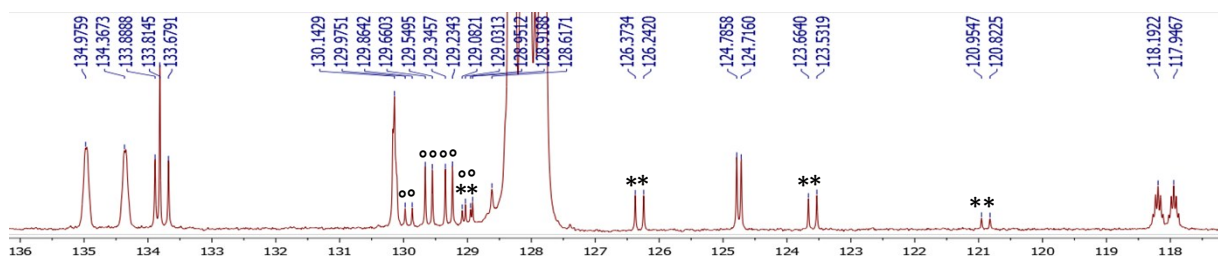

° C-CF<sub>3</sub> carbons, \* CF<sub>3</sub> carbons.

**Figure S35.**  $^{13}\text{C}\{^1\text{H}\}$  spectrum of **4** (100 MHz, 293K) in  $\text{C}_6\text{D}_6$ ; aromatic region

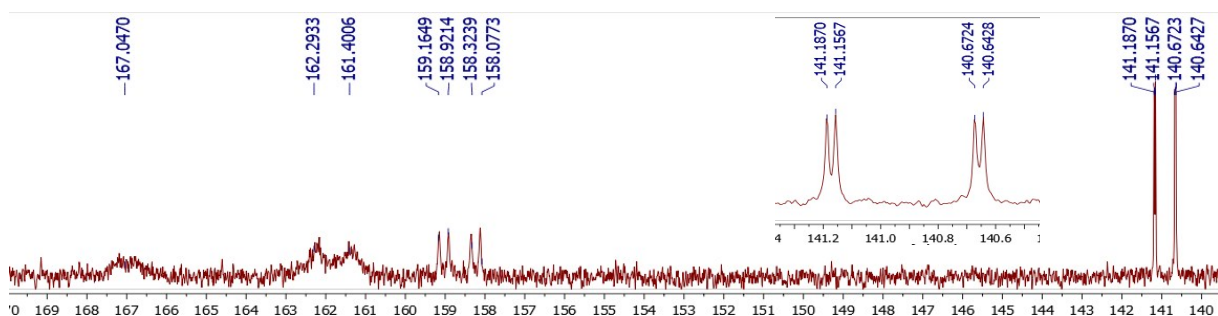

**Figure S36.**  $^{13}\text{C}\{^1\text{H}\}$  spectrum of **4** (100 MHz, 293K) in  $\text{C}_6\text{D}_6$ ; quaternary carbons region

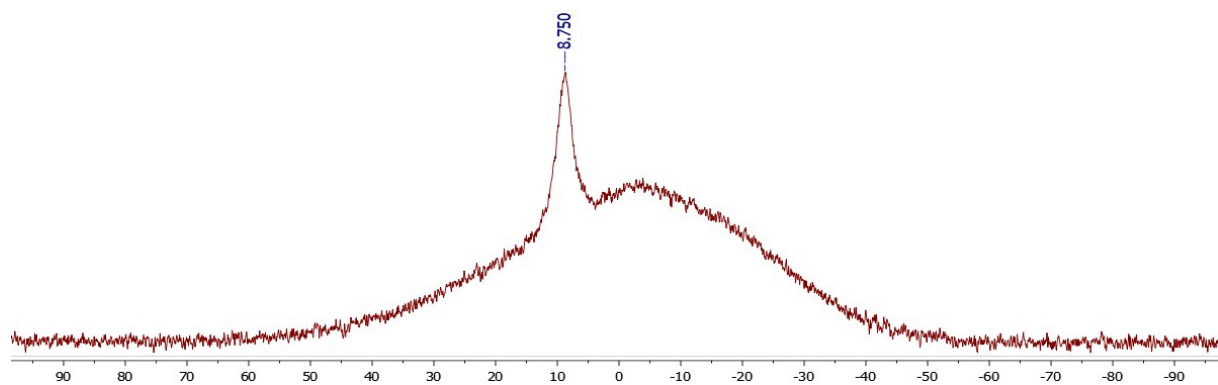

**Figure S37.**  $^{11}\text{B}$  NMR spectrum of **4** (128.4 MHz, 293K) in  $\text{C}_6\text{D}_6$

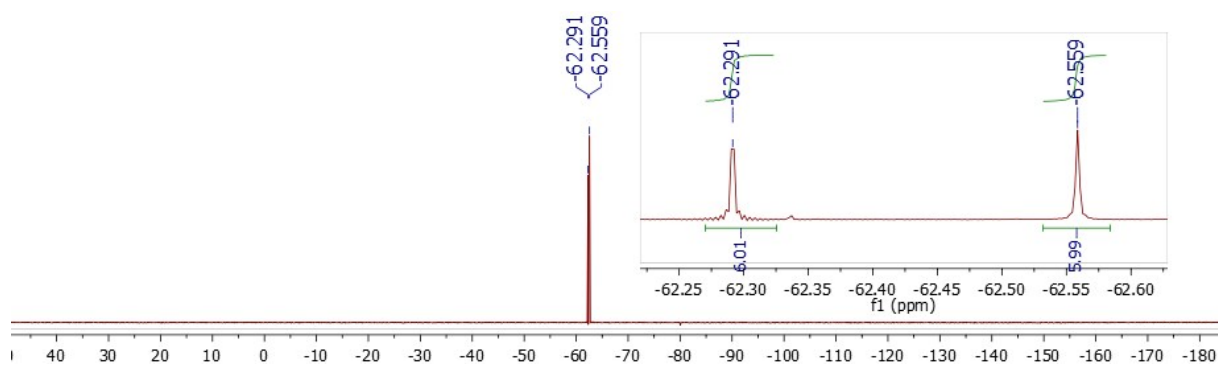

**Figure S38.**  $^{19}\text{F}$  spectrum of **4** (282.4 MHz, 293K) in  $\text{C}_6\text{D}_6$

## Synthesis of the (Cp)Rh(P,B)(CO) complex **5**

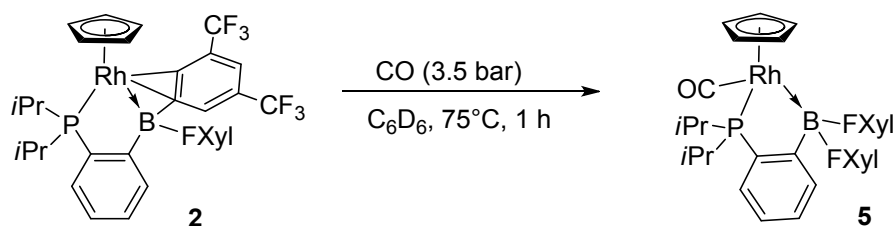

**2** (20 mg, 0.025 mmol) was dissolved in 0.5 mL of  $\text{C}_6\text{D}_6$  and charged in a pressure J. Young NMR tube. The reaction mixture was degassed via freeze pump thaw three times, then submitted to 3.5 bar of CO. The NMR tube was then heated to  $75^\circ\text{C}$  for one hour, and the solution became clear yellow. It was then degassed by freeze-pump-thaw and directly analysed by multinuclear NMR.

NB: The complex is stable enough to remove the excess of CO under vacuum, but it gives back 30% of the starting complex after 12 hours under dynamic vacuum.

HRMS (CI- $\text{CH}_4$ ): exact mass (monoisotopic) calcd. for  $[\text{M}+\text{H}]^+$  ( $\text{C}_{34}\text{H}_{30}\text{BF}_{12}\text{OPRh}$ ) $^+$ : 827.0991; found, 827.1010.

IR (DCM):  $\nu_{\text{CO}} = 2011\text{ cm}^{-1}$

$^1\text{H}$  NMR (500 MHz,  $\text{C}_6\text{D}_6$ , 293K,  $\delta$ ): 0.64 (dd, 3H,  $^3J_{\text{HP}} = 16.5\text{ Hz}$ ,  $^3J_{\text{HH}} = 7.5\text{ Hz}$ ,  $\text{CH}_{3\text{iPr}}$ ), 0.69 (dd, 3H,  $^3J_{\text{HP}} = 17.0\text{ Hz}$ ,  $^3J_{\text{HH}} = 7.0\text{ Hz}$ ,  $\text{CH}_{3\text{iPr}}$ ), 0.70 (dd, 3H,  $^3J_{\text{HP}} = 15.0\text{ Hz}$ ,  $^3J_{\text{HH}} = 7.0\text{ Hz}$ ,  $\text{CH}_{3\text{iPr}}$ ), 0.78 (dd, 3H,  $^3J_{\text{HP}} = 16.0\text{ Hz}$ ,  $^3J_{\text{HH}} = 7.0\text{ Hz}$ ,  $\text{CH}_{3\text{iPr}}$ ), 1.90 (m, 2H,  $\text{CH}_{\text{iPr}}$ ), 4.71 (s, 5H, Cp), 6.90 (m, 2H,  $\text{H}_{\text{arom}}$ ), 7.02 (m, 1H,  $\text{H}_{\text{arom}}$ ), 7.14 (m, 1H,  $\text{H}_{\text{arom}}$ ), 7.61 (s br, 1H,  $\text{H}_{\text{FXyl para}}$ ), 7.75 (s br, 1H,  $\text{H}_{\text{FXyl para}}$ ), 8.05 (s br, 2H,  $\text{H}_{\text{FXyl ortho}}$ ), 8.18 (s br, 2H,  $\text{H}_{\text{FXyl ortho}}$ ).

$^{13}\text{C}\{^1\text{H}\}$  NMR (125.8 MHz,  $\text{C}_6\text{D}_6$ , 293K,  $\delta$ ): 18.60 (s,  $\text{CH}_{3\text{iPr}}$ ), 19.41 (s,  $\text{CH}_{3\text{iPr}}$ ), 19.61 (s,  $\text{CH}_{3\text{iPr}}$ ), 19.93 (d,  $^2J_{\text{CP}} = 3.0\text{ Hz}$ ,  $\text{CH}_{3\text{iPr}}$ ), 26.51 (d,  $^1J_{\text{CP}} = 30.0\text{ Hz}$ ,  $\text{CH}_{\text{iPr}}$ ), 32.56 (d,  $^1J_{\text{CP}} = 23.0\text{ Hz}$ ,  $\text{CH}_{\text{iPr}}$ ), 93.34 (m, Cp), 118.81 (m,  $\text{CH}_{\text{para FXyl}}$ ), 118.96 (m,  $\text{CH}_{\text{para FXyl}}$ ), 124.79 (q,  $^1J_{\text{CF}} = 272.0\text{ Hz}$ ,  $\text{CF}_3$ ), 124.93 (q,  $^1J_{\text{CF}} = 273.0\text{ Hz}$ ,  $\text{CF}_3$ ), 125.84 (d,  $J_{\text{CP}} = 5.9\text{ Hz}$ ,  $\text{CH}_{\text{arom}}$ ), 129.70 (m,  $\text{CH}_{\text{arom}}$ ), 129.86 (q,  $^2J_{\text{CF}} = 32.0\text{ Hz}$ ,  $\text{C-CF}_3$ ), 130.38 (q,  $^2J_{\text{CF}} = 32.0\text{ Hz}$ ,  $\text{C-CF}_3$ ), 130.72 (d,  $J_{\text{CP}} = 2.4\text{ Hz}$ ,  $\text{CH}_{\text{arom}}$ ), 134.20 (d,  $J_{\text{CP}} = 22.0\text{ Hz}$ ,  $\text{CH}_{\text{arom}}$ ), 134.77 (m,  $\text{CH}_{\text{ortho FXyl}}$ ), 135.09 (m,  $\text{CH}_{\text{ortho FXyl}}$ ), 138.66 (dd,  $^1J_{\text{CP}} = 51.3\text{ Hz}$ ,  $^2J_{\text{CRh}} = 2.6\text{ Hz}$ ,  $\text{C}_{\text{ipsoP}}$ ), 192.36 (dd,  $^1J_{\text{CRh}} = 81.6\text{ Hz}$ ,  $^2J_{\text{CP}} = 21.0\text{ Hz}$ , CO). N.B.:  $\text{C}_{\text{ipsoB}}$  quaternary carbon atoms were not observed.

$^{11}\text{B}$  NMR (128.4 MHz,  $\text{CD}_2\text{Cl}_2$ , 293K,  $\delta$ ): 14.01 (s br).

$^{31}\text{P}\{^1\text{H}\}$  NMR (121 MHz,  $\text{CD}_2\text{Cl}_2$ , 293K,  $\delta$ ): 84.26 (d,  $^1J_{\text{PRh}} = 169.0\text{ Hz}$ ).

$^{19}\text{F}$  NMR (282.4 MHz,  $\text{CD}_2\text{Cl}_2$ , 293K,  $\delta$ ): -62.59 (s,  $\text{CF}_3$ ), -62.41 (s,  $\text{CF}_3$ ).

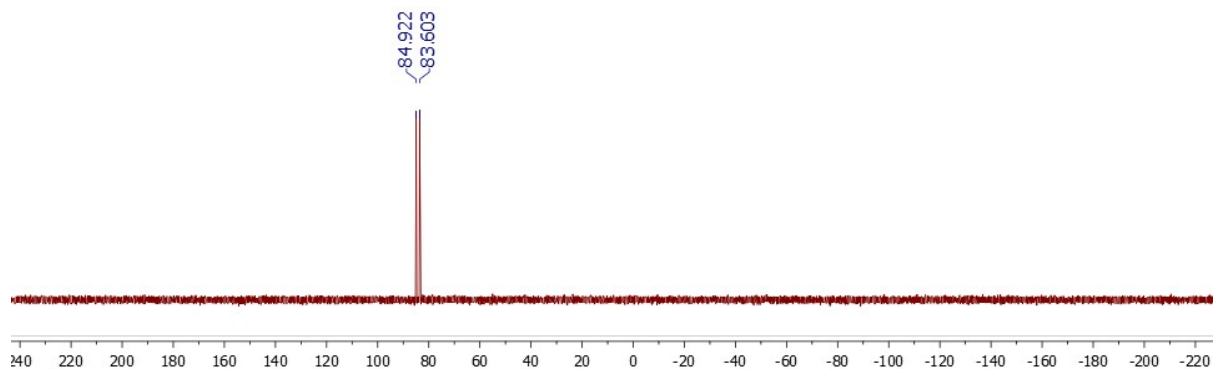

**Figure S39.**  $^{31}\text{P}\{^1\text{H}\}$  NMR spectrum of **5** (128 MHz, 293K) in  $\text{C}_6\text{D}_6$

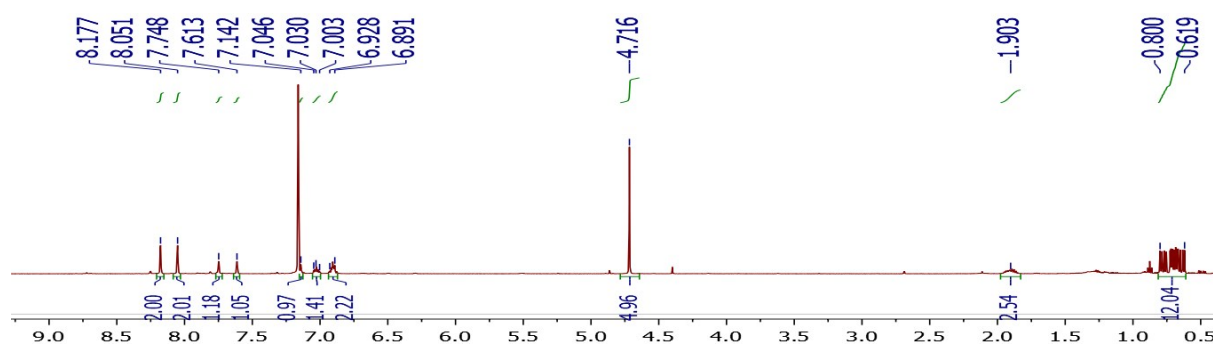

**Figure S40.**  $^1\text{H}$  NMR spectrum of **5** (500 MHz, 293K) in  $\text{C}_6\text{D}_6$

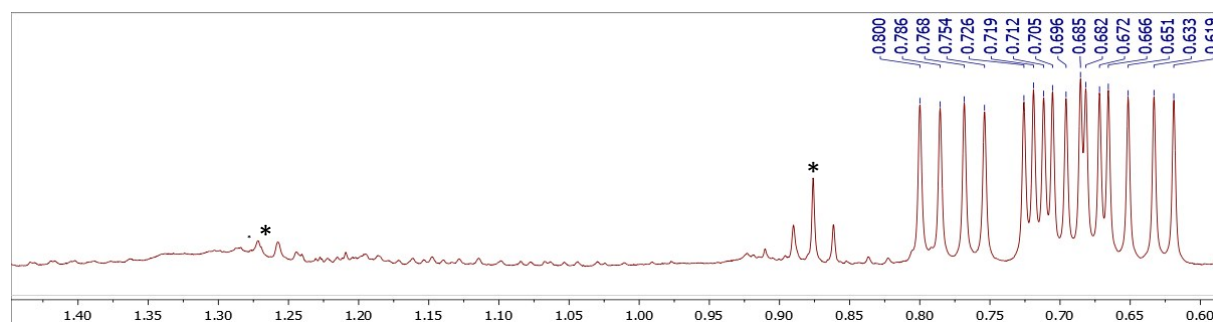

\* Pentane

**Figure S41.**  $^1\text{H}$  NMR spectrum of **5** (500 MHz, 293K) in  $\text{C}_6\text{D}_6$ ; aliphatic region

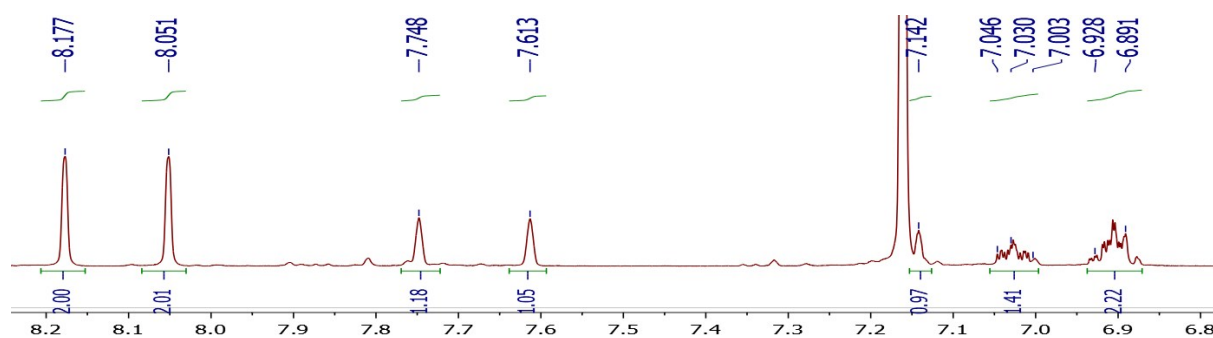

**Figure S42.**  $^1\text{H}$  NMR spectrum of **5** (500 MHz, 293K) in  $\text{C}_6\text{D}_6$ ; aromatic region

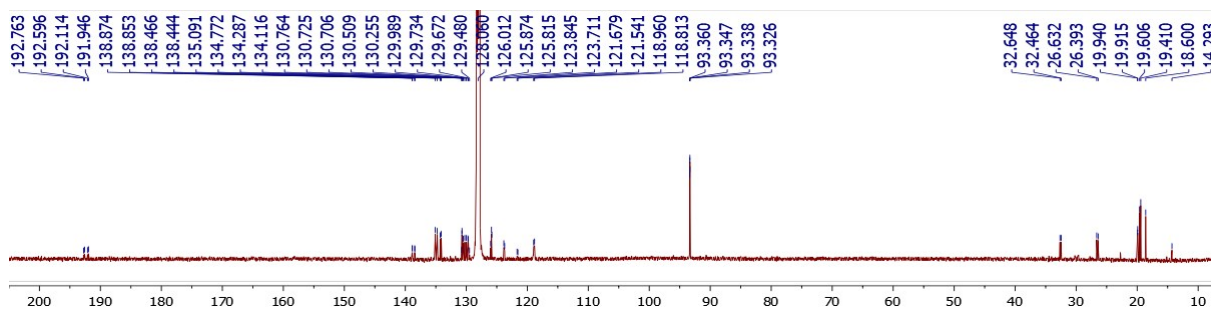

**Figure S43.**  $^{13}\text{C}\{^1\text{H}\}$  spectrum of **5** (125.8 MHz, 293K) in  $\text{C}_6\text{D}_6$

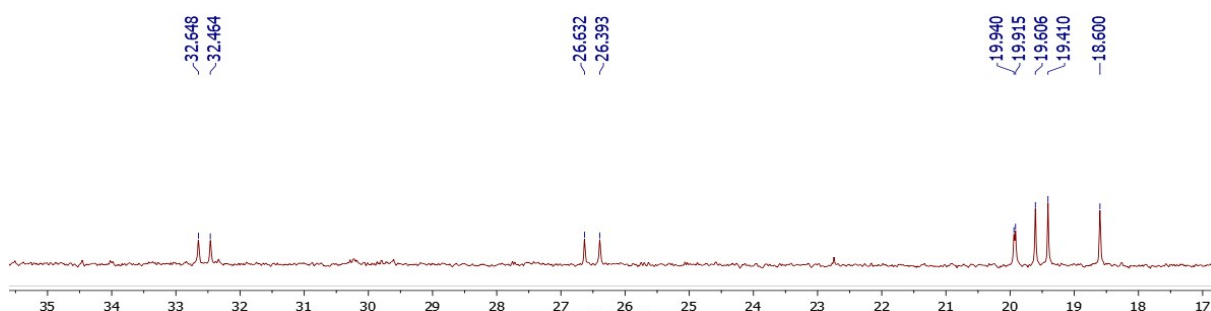

**Figure S44.**  $^{13}\text{C}\{^1\text{H}\}$  spectrum of **5** (125.8 MHz, 293K) in  $\text{C}_6\text{D}_6$ ; aliphatic region

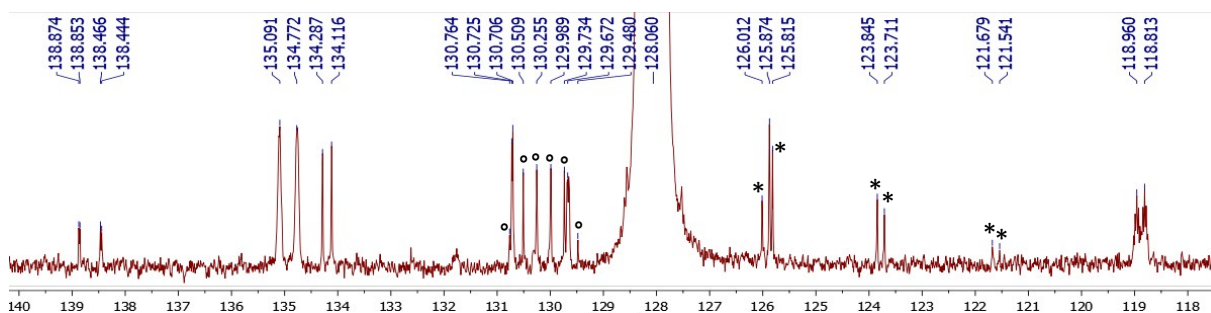

°  $\text{C}-\text{CF}_3$  carbon atoms, \*  $\text{CF}_3$  carbon atoms.

**Figure S45.**  $^{13}\text{C}\{^1\text{H}\}$  spectrum of **5** (125.8 MHz, 293K) in  $\text{C}_6\text{D}_6$ ; aromatic region

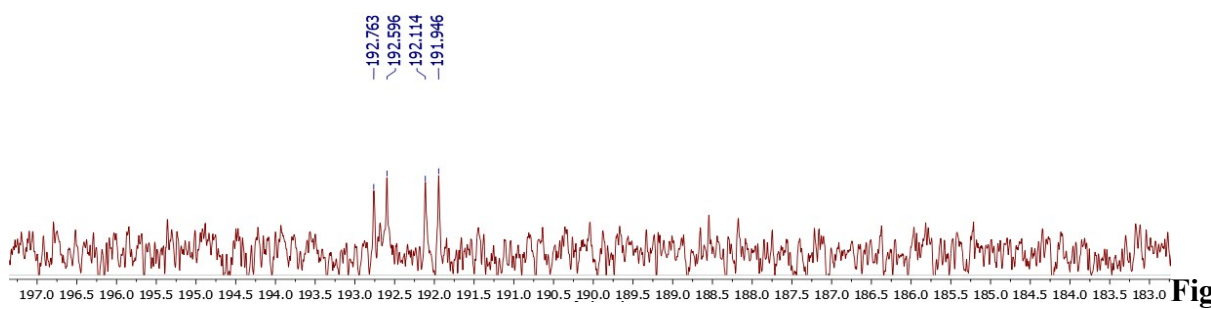

**Figure S46.**  $^{13}\text{C}$  spectrum of **5** (125.8 MHz, 293K) in  $\text{C}_6\text{D}_6$ ; CO region

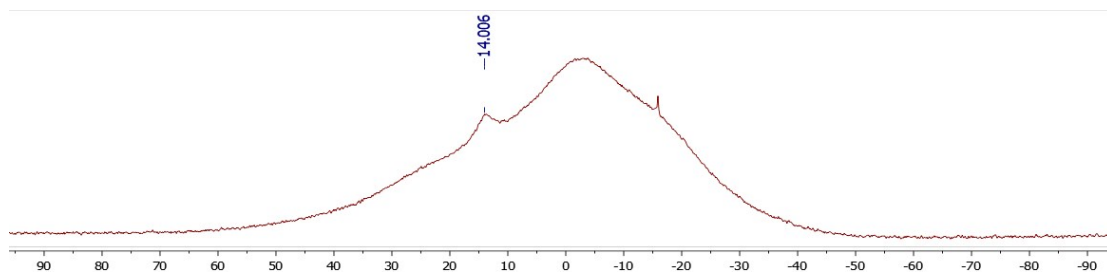

**Figure S47.**  $^{11}\text{B}$  NMR spectrum of **5** (128.4 MHz, 293K) in  $\text{C}_6\text{D}_6$

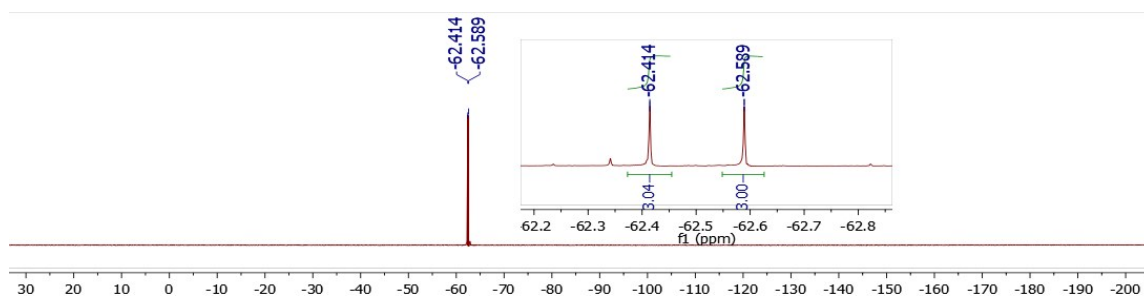

**Figure S48.**  $^{19}\text{F}$  spectrum of **5** (282.4 MHz, 293K) in  $\text{C}_6\text{D}_6$



## Crystallographic data

Crystallographic data were collected at low temperature (193(2)) on a Bruker-AXS APEXII QUAZAR diffractometer equipped with a 30W air-cooled microfocus source (MoK $\alpha$  radiation,  $\lambda = 0.71073$  Å). Phi- and omega- scans were used. An empirical absorption correction was employed.<sup>2</sup> The structures were solved by intrinsic phasing method<sup>3</sup> and refined by the least-squares method on F<sup>2</sup>.<sup>4</sup> All non-hydrogen atoms were refined with anisotropic displacement parameters and the hydrogen atoms were refined isotropically. The hydrogen atoms were refined at calculated positions using the riding model.

CCDC 1938717 (**2**), 1938718 (**3**) and 1938719 (**4**) contain the supplementary crystallographic data for this paper. These data can be obtained free of charge from The Cambridge Crystallographic Data Centre.

**2:** C<sub>33</sub>H<sub>29</sub>BF<sub>12</sub>PRh,  $M = 798.25$ , monoclinic,  $P2_1/n$ ,  $a = 13.0614(9)$  Å,  $b = 12.3133(6)$  Å,  $c = 20.7087(13)$  Å,  $\alpha = \gamma = 90^\circ$ ,  $\beta = 105.427(4)^\circ$ ,  $V = 3210.6(3)$  Å<sup>3</sup>,  $Z = 4$ , crystal size 0.10 x 0.04 x 0.02 mm<sup>3</sup>, 35921 reflections collected (8274 independent,  $R_{int} = 0.0844$ ), 554 parameters,  $R1 [I > 2\sigma(I)] = 0.0472$ ,  $wR2 [all\ data] = 0.1196$ , largest diff. peak and hole: 0.752 and -0.655 eÅ<sup>-3</sup>.

**3:** C<sub>36</sub>H<sub>38</sub>BF<sub>12</sub>P<sub>2</sub>Rh,  $M = 874.32$ , monoclinic,  $P2_1/n$ ,  $a = 14.0294(5)$  Å,  $b = 17.6591(7)$  Å,  $c = 15.1340(6)$  Å,  $\alpha = \gamma = 90^\circ$ ,  $\beta = 105.427(4)^\circ$ ,  $V = 3738.8(2)$  Å<sup>3</sup>,  $Z = 4$ , crystal size 0.10 x 0.08 x 0.06 mm<sup>3</sup>, 36863 reflections collected (6553 independent,  $R_{int} = 0.0566$ ), 551 parameters,  $R1 [I > 2\sigma(I)] = 0.0387$ ,  $wR2 [all\ data] = 0.0954$ , largest diff. peak and hole: 0.686 and -0.507 eÅ<sup>-3</sup>.

**4:** C<sub>42</sub>H<sub>38</sub>BF<sub>12</sub>NPRh,  $M = 929.42$ , monoclinic,  $P2_1/c$ ,  $a = 11.1009(10)$  Å,  $b = 19.504(2)$  Å,  $c = 18.980(2)$  Å,  $\alpha = \gamma = 90^\circ$ ,  $\beta = 100.359(3)^\circ$ ,  $V = 4042.6(7)$  Å<sup>3</sup>,  $Z = 4$ , crystal size 0.14 x 0.06 x 0.04 mm<sup>3</sup>, 94983 reflections collected (9997 independent,  $R_{int} = 0.0654$ ), 594 parameters,  $R1 [I > 2\sigma(I)] = 0.0356$ ,  $wR2 [all\ data] = 0.0891$ , largest diff. peak and hole: 0.642 and -0.506 eÅ<sup>-3</sup>.

<sup>2</sup> Bruker, *SADABS*, Bruker AXS Inc., Madison, Wisconsin, USA.

<sup>3</sup> G. M. Sheldrick *Acta Cryst.* **2015**, A71, 3–8.

<sup>4</sup> G. M. Sheldrick *Acta Cryst. A* **2008**, 64, 112–122.
